# Supplementary material for: Comparative metabolomics provides novel insights into correlation between dominant habitat factors and constituents of Stellaria Radix (Stellaria dichotoma L. var. lanceolata Bge.)
Source: Front Plant Sci. 2022 Nov 25;13:1035712. doi: 10.3389/fpls.2022.1035712 (PMC9733579; doi:10.3389/fpls.2022.1035712)
Supplement: Supplementary file 6 [file Table_1.xlsx]

## Sheet: Sheet1
Supplementary Table 1 Basic information of all metabolites
No.	ID	Name	Mouble
1	M100T356	Hymexazole	pos
2	M100T57	5-aminovaleric acid	pos
3	M101T212	3-hydroxyisovaleric acid	pos
4	M100T331	3-Butynoic acid	neg
5	M102T299	4-hydroxy-l-isoleucine	pos
6	M1028T248	Soyasapogenol b + dhex + hex + hexa + malonyl	neg
7	M102T78	Stachydrine	pos
8	M1033T42_1	Solasodine base + o-hex-hex-hex-pen	pos
9	M1035T92	Tomatine	pos
10	M102T374	Dimethylglycine	neg
11	M103T260	Phenylacetaldehyde	pos
12	M103T351	Pentanoic acid	pos
13	M104T373	4-Aminobutyric acid(GABA)	pos
14	M103T396	Malonic acid	neg
15	M1043T362_2	Lstc	pos
16	M104T270_2	Glycerophosphocholine	pos
17	M106T417	Serine	pos
18	M1051T464	Cyanidin 3-o-[2''-o-(xylosyl)-6''-o-(p-o-(glucosyl)-p-coumaroyl) glucoside] 5-o-glucoside	pos
19	M105T176	Phenylethylamine	pos
20	M110T454	N-.alpha.-(tert-butoxycarbonyl)-l-histidine	pos
21	M105T38	4-methylbenzyl alcohol	pos
22	M112T85	Leucenol	pos
23	M1081T284	Blood group a trisaccharide	pos
24	M105T305	Glyceric acid	neg
25	M109T269	Quinone	pos
26	M108T52	3-nitrophenol	neg
27	M109T358	Dihydrothymine	neg
28	M114T305	Hydroxyproline	pos
29	M110T52	4-aminophenol	pos
30	M110T160	Pyrrole-2-carboxylic acid	neg
31	M111T331	2-furancarboxylic acid	neg
32	M111T469_2	Dihydroxyacetone	neg
33	M112T196	Cytosine	pos
34	M112T392	Histamine	pos
35	M114T271	L-Proline	neg
36	M113T161	Uracil	pos
37	M113T392_1	(2e,4e)-hexa-2,4-dienoic acid	pos
38	M1127T328_2	APIIN	neg
39	M114T311_2	Proline	neg
40	M114T349	D-Proline	neg
41	M114T55	Maleamic acid	neg
42	M114T50	Ethosuximide	pos
43	M116T341	DL-proline	pos
44	M115T201	Psoralen	pos
45	M116T521	L-hydroxyarginine	pos
46	M115T52	Maleic acid	neg
47	M118T116	Guanidoacetic acid	pos
48	M115T331	Vitamin c	neg
49	M116T207	N-methyl-n-(tetrahydro-2-furanylmethyl)-4-piperidinamine	pos
50	M118T303_2	DL-valine	pos
51	M118T431	Dl-homocysteine	pos
52	M117T390_2	Succinate	neg
53	M117T201	Chlordimeform	pos
54	M115T80_2	Isocaproic acid	neg
55	M117T153	2-methyl-3-hydroxybutyric acid	neg
56	M118T153_1	L-homoserine	neg
57	M117T262	2-Hydroxy-3-methylbutyric acid	neg
58	M118T261	Indole	pos
59	M1150T140_1	Valinomycin	pos
60	M119T520	Tartronate	neg
61	M124T241	1-methyl-l-histidine	pos
62	M119T221	4-methylhippuric acid	pos
63	M119T37	Polygodial	pos
64	M119T51	P-toluamide	pos
65	M128T302_2	L-pyroglutamic acid	neg
66	M120T260	Tyramine	pos
67	M121T182_2	4-imidazoleacrylic acid	pos
68	M128T228	4-Guanidinobutyric acid	pos
69	M130T282	L-arginine, methyl ester	pos
70	M123T242	Benzoic acid	pos
71	M121T37	4-hydroxybenzaldehyde	neg
72	M123T64	Niacinamide	pos
73	M130T375	D-pyroglutamic acid	pos
74	M122T359	Quinolinate	neg
75	M124T341_2	Nicotinate	pos
76	M125T180	Nitrosobenzene	pos
77	M118T277_2	Betaine	pos
78	M130T382	N-Acetyl-L-alanine	neg
79	M125T230	Fenpropathrin	pos
80	M126T105	3-hydroxyacetaminophen	pos
81	M126T190	5-methyl-2'-deoxycytidine	pos
82	M125T176	Hydroxyhydroquinone	neg
83	M127T188	Melamine	pos
84	M125T268	Triacetic acid lactone	neg
85	M127T366_2	1,6-anhydro-2,3-o-isopropylidene-.beta.-d-mannopyranose	pos
86	M125T376	3R-hydroxy-butanoic acid	neg
87	M127T375	Dihydro-4,4-dimethyl-2,3-furandione	neg
88	M131T241	DL-3-Phenyllactic acid	pos
89	M129T107	Citraconic acid	neg
90	M129T137_2	Dehydro-l-(+)-ascorbic acid dimer	neg
91	M132T354	L-Isoleucine	pos
92	M131T201	Asparagine	neg
93	M128T73	2-(4-amino-1-piperidinyl)ethanol	pos
94	M132T53	Cis-4-hydroxy-l-proline	pos
95	M132T91_2	Ser-Arg	pos
96	M130T134	Paxilline	pos
97	M130T268	Goitrin	pos
98	M131T374	Glutaric acid	neg
99	M132T405	D-aspartic acid	neg
100	M129T61	Mesaconic acid	neg
101	M134T234	N-methyl-l-threonine	pos
102	M130T54	Indoleacetic acid	pos
103	M134T404	L-aspartic acid	pos
104	M131T153	Cinnamic acid ethyl ester	pos
105	M134T62	O-t-butyl-l-threonine methyl ester	pos
106	M131T193	Mevalonic acid	pos
107	M136T430	S-Methyl-L-cysteine	pos
108	M140T67	3-amino-2,3-dihydrobenzoic acid	pos
109	M132T135	S(-)-cathinone	pos
110	M143T338	Ectoine	pos
111	M132T48	3-Methylindole	pos
112	M144T258	Dl-2-methylglutamic acid	pos
113	M144T261	N.alpha.-methyl-l-lysine	pos
114	M144T377	Isobutyrylglycine	neg
115	M133T154	Estra-4,9-diene-3,17-dione	pos
116	M144T60	L-homoarginine	pos
117	M144T96	L-glutamic acid, dimethyl ester	pos
118	M133T194	(2s,3s)-(-)-3-phenylglycidol	pos
119	M133T34	2-methylamino-1-phenylbutane	pos
120	M134T135	2-amino-4-methylbenzophenone	pos
121	M146T237	N-methyl-l-isoleucine	pos
122	M145T375	Glutamine	neg
123	M146T261	DL-O-tyrosine	pos
124	M133T113	2'-Deoxy-D-ribose	neg
125	M146T302	N-acetylserine	neg
126	M135T435	Resveratrol	pos
127	M147T254_2	D-glutamine	pos
128	M136T170	Adenine	pos
129	M147T276_1	L-Arabinono-1,4-lactone	neg
130	M136T30	Anthranilic acid (Vitamin L1)	neg
131	M136T36	2-hydroxy-3-methoxybenzaldehyde	neg
132	M136T99_2	4-aminobenzoate	neg
133	M137T299_2	4-hydroxybenzoate	neg
134	M136T98	3-hydroxyanthranilic acid	pos
135	M137T172_2	4-hydroxy-3-methoxybenzyl alcohol	pos
136	M137T217	Hypoxanthine	pos
137	M130T269_2	Isoleucine	neg
138	M137T34	Salicylic acid	neg
139	M137T341_2	Shikimate	neg
140	M139T182	Urocanate	pos
141	M147T430	DL-glutamine	pos
142	M141T242	(-)-quebrachitol	pos
143	M142T117	N-phenyl-1-naphthylamine	pos
144	M147T521	DL-Lysine	pos
145	M138T291_2	Trigonelline	pos
146	M142T392	Dimetridazole	pos
147	M142T57	N-tert-butyl-6-methoxy-1,3,5-triazine-2,4-diamine	pos
148	M143T264	1-acetyl-3-piperidinamine	pos
149	M148T397_2	Glutamic acid	pos
150	M142T200	Indoleacrylic acid	neg
151	M143T43	Pyruvaldehyde	neg
152	M144T201	Ala-Ala	pos
153	M143T60_2	Caprylic acid	neg
154	M148T344	L-Methionine	neg
155	M151T384_1	Cysteic acid	neg
156	M144T36	Indole-3-carboxaldehyde	neg
157	M151T65	Pro-Gly-Lys	pos
158	M144T288	DL-2-Aminoadipic acid	pos
159	M152T287	Gln-arg	pos
160	M144T86	Quinolin-2-ol	neg
161	M153T262	N2-trifluoroacetyl-l-glutamine	neg
162	M145T184	3-aminoquinoline	pos
163	M146T194	Acetylcholine	pos
164	M145T237_1	L-Rhamnose	neg
165	M157T183	L-dihydroorotate	neg
166	M156T302	L-Histidine	pos
167	M158T405	N.alpha.-(tert-butoxycarbonyl)-l-aspartic acid	neg
168	M141T349	Cis,cis-muconic acid	neg
169	M146T67	4-hydroxyquinoline	pos
170	M147T221_2	Bisdemethoxycurcumin	pos
171	M159T269	Gluconolactone	neg
172	M158T300	Diethyl l-glutamate	pos
173	M162T299	Acetylcysteine	neg
174	M147T38	Coumarin	pos
175	M162T35	4-hydroxy-l-glutamic acid	neg
176	M147T397	Itaconic acid	neg
177	M147T50	Trans-2-hydroxycinnamic acid	pos
178	M164T268	Phenylalanine	neg
179	M165T107	1,2-Benzenedicarboxylic acid	neg
180	M147T54	Myosmine	pos
181	M165T194	Atrolactic acid	neg
182	M149T137	N-benzylacetamidine	pos
183	M149T163	Stylopine	pos
184	M162T409	2-aminoadipic acid	pos
185	M149T151	D-ribose	neg
186	M149T304_2	3-methylphenylacetic acid	neg
187	M149T210	Trans-cinnamic acid	pos
188	M149T348	D-lyxose	neg
189	M151T181	4-Acetoxyphenol	neg
190	M151T216	Xanthine	neg
191	M149T262	trans-cinnamate	pos
192	M149T31	Monobutyl phthalate	pos
193	M149T440	Dl-4-hydroxy-3-methoxymandelic acid	pos
194	M150T105	7-methyladenine	pos
195	M150T241	3-methyladenine	pos
196	M151T240_2	Ribitol	neg
197	M151T302	Xylitol	neg
198	M151T36	Vanillin	neg
199	M166T260	DL-phenylalanine	pos
200	M153T101	Gentisic acid	neg
201	M151T119	Synephrine	pos
202	M151T171	D-xylose	pos
203	M151T27	Triethylene glycol	pos
204	M151T51	3-methoxytyramine	pos
205	M168T356_1	1-methylhistidine	neg
206	M152T263	2-Hydroxyadenine	pos
207	M168T384	4-hydroxy-l-phenylglycine	pos
208	M152T360	Deoxyguanosine	pos
209	M172T332	L-leucine, n-acetyl	neg
210	M170T416	3-Methylhistidine	pos
211	M153T289	3,4-dihydroxybenzoic acid	neg
212	M154T429	Fludarabine	pos
213	M153T299	Glycerol 3-phosphate	neg
214	M171T233	Pro-Pro-Lys	pos
215	M154T60	Methyl 3-aminopyrazine-2-carboxylic acid	pos
216	M172T43	Gabapentin	pos
217	M157T56_2	Pelargonic acid	neg
218	M155T140	1-naphthoic acid	pos
219	M155T300	Niclosamide	pos
220	M158T306	Acetyl-DL-Valine	neg
221	M155T38	4-hydroperoxy-2-nonenal	pos
222	M173T375	Isocitric acid	neg
223	M158T353	Indole-3-butyric acid	neg
224	M173T441	Cis-aconitate	neg
225	M174T473	Ala-Thr-Arg	pos
226	M174T275	L-citrulline	neg
227	M174T392	Guanidinosuccinic acid	neg
228	M156T403	Histidine	pos
229	M175T395	Arginine	pos
230	M160T33	Indole-3-carboxylic acid	neg
231	M161T116	7-hydroxycoumarin	neg
232	M157T136	Indole-3-acetonitrile	pos
233	M175T429	Ser-Ser-Arg	pos
234	M161T137_1	5,8-dihydroxy-1,4-naphthoquinone	neg
235	M161T391_2	3-hydroxy-3-methylglutaric acid	neg
236	M162T104	8-fluoroquinolin-4-ol	neg
237	M159T117	2-heptyl-4-hydroxyquinoline n-oxide	pos
238	M156T454	L-carnosine	pos
239	M162T327	L-Erythro-4-Hydroxyglutamic acid	neg
240	M177T351	L-Ascorbic acid	pos
241	M163T201	Dulcitol	neg
242	M163T272	P-coumaric acid	neg
243	M163T305	D-quinovose	neg
244	M177T401	3-Hydroxy-4-methoxycinnamic acid	pos
245	M164T64_2	Formylanthranilic acid	neg
246	M182T158	N-acetyl-o-fluoro-dl-phenylalanine	neg
247	M165T117	Phenyllactic acid	neg
248	M159T184_1	Allantoin	pos
249	M160T135_2	2-amino-1-naphthol	pos
250	M160T386	Cyclohexylamine	pos
251	M165T141	3,4-dihydroxymandelic acid	neg
252	M160T47	Indole-3-acetaldehyde	pos
253	M185T140	Gabapentin related compound e	neg
254	M161T194	Mellein	pos
255	M165T282	L-fucitol	neg
256	M165T359	D-arabinonic acid	neg
257	M162T121	D-mannosamine	pos
258	M165T37	3-Methoxy-4-hydroxyphenylethyleneglycol	neg
259	M165T73	Vanylglycol	neg
260	M162T355	L-carnitine	pos
261	M180T497	Ser-Pro-Arg	pos
262	M163T77	Nicotine	pos
263	M182T303_2	DL-tyrosine	pos
264	M166T323	7-methylguanine	pos
265	M167T130	Bendiocarb	pos
266	M166T112	7-Methylxanthine	neg
267	M166T235	Pyridoxal	neg
268	M167T135	2,3-dihydroxybiphenyl	neg
269	M185T58_2	3-Phosphoserine	neg
270	M167T176_2	Dioxacarb	pos
271	M167T333_2	Vanillic acid	neg
272	M168T289	2-methoxy-5-nitrophenol	neg
273	M187T111	Nepsilon,nepsilon,nepsilon-trimethyllysine	neg
274	M168T479	6-Hydroxydopamine	neg
275	M168T236	Pyridoxal (Vitamin B6)	pos
276	M169T31	Dihydroxyacetone phosphate	neg
277	M171T386	Glycerophosphate(2)	neg
278	M187T265	Val-Ala	neg
279	M171T66	1-naphthalenecarboxaldehyde, 2-hydroxy	neg
280	M157T280_2	2-oxooctanoic acid	neg
281	M170T108	Pyridoxine	pos
282	M187T375	Homocitrate	neg
283	M170T342	7-keto-8-aminopelargonic acid	pos
284	M187T401	N-acetylglutamine	neg
285	M170T82	1,5-naphthyridine, 2-[3-(6-methyl-2-pyridinyl)-1h-pyrazol-4-yl]-	pos
286	M172T356	Quinaldic acid	neg
287	M171T168	Resorcinol	pos
288	M185T50	Fuberidazole	pos
289	M188T383	N-acetyl-l-glutamate	neg
290	M172T52_2	8-hydroxyquinoline-2-carbaldehyde	neg
291	M173T361	Suberic acid	neg
292	M174T183	4-quinolinecarboxylate	pos
293	M187T302	Pro-Ala	pos
294	M190T344	N-acetyl-l-methionine	neg
295	M189T234	Thr-Thr-Arg	pos
296	M191T33	Isoscopoletin	neg
297	M189T517	L-ng-monomethylarginine	pos
298	M175T241	Juglone	pos
299	M175T106	3-Isopropylmalate	neg
300	M175T344	2-Isopropylmalic acid	neg
301	M177T107	D-glucono-1,5-lactone	neg
302	M189T537	N6,N6,N6-Trimethyl-L-lysine	pos
303	M189T57	Glycyl-l-4-hydroxyproline	pos
304	M190T381_2	.alpha.-guanidinoglutaric acid	pos
305	M177T36	Coniferyl aldehyde	neg
306	M191T468	Citrate	neg
307	M177T377	2-dehydro-3-deoxy-d-gluconate	neg
308	M177T135_2	Serotonin	pos
309	M190T50	D-4-Hydroxyphenylglycine	pos
310	M179T151	Coniferyl alcohol	neg
311	M179T308	Alpha-D-Glucose	neg
312	M179T335	L-Sorbose	neg
313	M179T366	D-psicose	neg
314	M169T48_2	Norharmane	pos
315	M177T211	7-hydroxy-4-methylchromen-2-one	pos
316	M177T238	Trans-ferulic acid	pos
317	M191T422	Ureidoglutaric acid	pos
318	M179T53_1	Coniferol	neg
319	M192T267	Thioarginine	pos
320	M194T212	2-methyl-n-(4-methylphenyl)alanine	pos
321	M194T334	Pro-Asp-Arg	pos
322	M181T170	Harmane	neg
323	M177T50	Icilin	pos
324	M195T68	Leu-Thr-Arg	pos
325	M181T259	Dihydroconiferyl alcohol	neg
326	M181T275	D-sorbitol	neg
327	M179T172_2	Dihydroisoferulic acid	pos
328	M181T349_1	3,4-dihydroxyhydrocinnamic acid	neg
329	M181T54	Methyl orsellinate	neg
330	M181T80	Dl-4-hydroxyphenyllactic acid	neg
331	M179T35_1	Conessine	pos
332	M180T107	Adrenochrome	pos
333	M198T107	Kinetin	pos
334	M182T46	4-pyridoxic acid	neg
335	M183T248	Barbital	neg
336	M180T173	P-acetaminobenzoic acid	pos
337	M183T27	2,4-dinitrophenol	neg
338	M180T234	Fusaric acid	pos
339	M183T66	5-hydroxyisovanillic acid	neg
340	M200T114	N5-(1-imino-3-butenyl)-l-ornithine	pos
341	M180T286_2	2-dimethylamino-6-hydroxypurine	pos
342	M199T222_2	O-Phospho-L-homoserine	neg
343	M181T163_2	Karbutilate	pos
344	M181T36	Phenanthroline	pos
345	M201T262	Pro-Glu-Arg	pos
346	M182T366	Pargyline	pos
347	M182T378	L-Tyrosine	pos
348	M201T529	Ile-Leu-Arg	pos
349	M183T408	D-Mannitol	pos
350	M186T200	Indolelactic acid	neg
351	M202T70	Pro-Met-Arg	pos
352	M203T229	Pro-ser	pos
353	M184T386	Phosphorylcholine	pos
354	M187T347_2	Azelaic acid	neg
355	M184T69	3,5,9-trioxa-4-phosphatetracosan-1-aminium, 7-(acetyloxy)-24-carboxy-4-hydroxy-n,n,n-trimethyl-, inner salt, 4-oxide, (r)-	pos
356	M203T374	Glu-Thr-Arg	pos
357	M203T504_2	Ng,ng-dimethyl-l-arginine	pos
358	M188T185	Kynurenic acid	neg
359	M203T65	.alpha.-L-Glu-Gly	neg
360	M204T445	Ala-Asn	pos
361	M186T105	N-Acetylmannosamine	pos
362	M187T265_2	Deoxyvasicinone	pos
363	M206T302	S-methyl-l-thiocitrulline	pos
364	M187T48	Tetrahydromagnolol	pos
365	M189T107	2,4-dichlorobenzoic acid	neg
366	M188T303_1	DL-Indole-3-lactic acid	pos
367	M190T280	N-Acetyl-DL-methionine	neg
368	M206T322	N-Acetyl-L-phenylalanine	neg
369	M175T282_2	N-.alpha.-acetyl-l-ornithine	pos
370	M209T298	Dl-lanthionine	pos
371	M191T279	D-glucarate	neg
372	M210T71	Glu-Asp-Arg	pos
373	M189T278	Vasicine	pos
374	M213T419	Pro-pro	pos
375	M191T358	Mucic acid	neg
376	M214T175	L-n5-(1-imino-3-pentenyl)ornithine	pos
377	M213T107	m-Chlorohippuric acid	neg
378	M190T181	Methyl indole-3-acetate	pos
379	M190T338	1h-indole-2-carboxylic acid, ethyl ester	pos
380	M215T292	Pro-val	pos
381	M215T49	7-aminodesacetoxycephalosporanic acid	pos
382	M217T216	Val-Val	pos
383	M217T371	Glu-Glu-Arg	pos
384	M191T68	Sedoheptulosan	neg
385	M216T343	Gln-Ala	neg
386	M193T235	2-keto-l-gulonic acid	neg
387	M193T35_1	Myristicine	pos
388	M193T35_2	Tripropylene glycol	pos
389	M175T521_2	DL-arginine	pos
390	M193T49	Scopoletin	pos
391	M193T304	Caffeine	neg
392	M193T327	Perseitol	neg
393	M179T392	Myo-inositol	neg
394	M193T357	D-glucuronic acid	neg
395	M195T150	Hydroferulic acid	neg
396	M219T278_1	Phe-Asp-Arg	pos
397	M194T588	Isoproterenol	pos
398	M195T343	Resodiacetophenone	pos
399	M191T268	Quinate	neg
400	M219T418	5-L-Glutamyl-L-alanine	pos
401	M196T276	.alpha.-methyl-l-tyrosine	pos
402	M195T453	D-gluconate	neg
403	M193T268_1	D-pinitol	neg
404	M220T359	N.omega.-nitro-l-arginine	pos
405	M195T550	L-Threonate	neg
406	M197T177	DL-Vanillylmandelic acid	neg
407	M198T366	D-Mannose	pos
408	M197T26	4,6-dinitro-o-cresol	neg
409	M199T428	Cymoxanil	pos
410	M199T51_1	4-nitrosodiphenylamine	pos
411	M222T392	His-Met-Arg	pos
412	M224T241_1	Dacarbazine	pos
413	M227T171	Nitrotyrosine	pos
414	M202T267	Acetylcarnitine	neg
415	M227T341	His-Ala	pos
416	M227T169	Trifluoroacetic acid	neg
417	M227T185	Butyric acid, 4-[(4-chloro-o-tolyl)oxy]-	neg
418	M195T379	L-gulono-1,4-lactone	neg
419	M229T304_1	Pro-leu	pos
420	M197T44	Homoveratric acid	pos
421	M229T424	Pro-hyp	pos
422	M229T549	L-leucyl-l-proline	pos
423	M203T560	NG,NG-dimethyl-L-arginine(ADMA)	pos
424	M204T265	L-tryptophanamide	pos
425	M230T43_1	Arg-Gln-Arg	pos
426	M204T33	Xanthurenic acid	neg
427	M231T200	Dl-Leu-dl-Val	pos
428	M205T32	Levamisole	pos
429	M204T356	1h-imidazol-1-yloxy, 2-(4-carboxyphenyl)-4,5-dihydro-4,4,5,5-tetramethyl-, 3-oxide	neg
430	M205T67	5h-dibenzo[a,d]cyclohepten-5,10-imine, 10,11-dihydro-5-methyl-, (5s,10r)-	pos
431	M204T461	5-methoxyindoleacetate	neg
432	M204T71	Pantothenol	neg
433	M231T402_2	N-Acetyl-L-glutamic acid	pos
434	M232T382	Arg-gly	pos
435	M207T240	6,7-dimethylesculetin	pos
436	M207T51	P-methoxycinnamic acid ethyl ester	pos
437	M208T160	Benzoylcholine	pos
438	M207T73	D-Arabinono-1,4-lactone	neg
439	M208T197	Phenylalanine betaine	pos
440	M233T401	Pyroglu-Cys	pos
441	M210T166	2,2-bis[hydroxymethyl]-2,2',2''-nitrilotriethanol	pos
442	M234T245_2	L-ng-nitroarginine methyl ester	pos
443	M235T430	Glu-Ser	pos
444	M211T350_2	N-(4-chlorophenyl)-4-piperidinamine	pos
445	M209T266	Sinapyl alcohol	neg
446	M212T237	Methyldopa	pos
447	M239T189	.beta.-carboline-1-propionic acid	neg
448	M212T379	Methyl .alpha.-d-mannopyranoside	pos
449	M213T156	Perillyl alcohol	pos
450	M209T437	D-Galactarate	neg
451	M213T382	Triethanolamine	pos
452	M211T293	Adenosine 2'-monophosphate	neg
453	M239T32_1	Cystine	neg
454	M213T45	2,4,5-trimethoxybenzoic acid	pos
455	M214T103	Tetradecylamine	pos
456	M238T107	N-(2,4-dinitrophenyl)-l-valine	pos
457	M211T84	2,3-dideoxyuridine	neg
458	M242T367	Pro-gln	neg
459	M213T20	2,4-dihydroxybenzophenone	neg
460	M215T21	Phenyl salicylate	pos
461	M240T394	S-(4-fluorophenyl)mercapturic acid	pos
462	M243T353	Glu-Pro	neg
463	M213T28	8-chlorotheophylline	neg
464	M214T393	sn-Glycerol 3-phosphoethanolamine	neg
465	M216T183	Atrazine	pos
466	M217T180	Tetrahydroharmine	pos
467	M244T267	Ala-Arg	neg
468	M245T379	gamma-L-Glutamyl-L-valine	neg
469	M215T65	2,3-naphthalenedicarboxylic acid	neg
470	M217T252	Carboline base + 4h, carboxylic acid	pos
471	M251T310	His-Pro	neg
472	M244T251	Agomelatine	pos
473	M245T187_2	Leu-Leu	pos
474	M219T161	Carphedon	pos
475	M219T182	Hydroxyebastine	pos
476	M219T210	8-acetyl-7-methoxycoumarin	pos
477	M219T231	L-abrine	pos
478	M245T232	Palythine	pos
479	M253T407	D-galacturonic acid	neg
480	M246T487	Arg-Ala	pos
481	M217T151	Chlorophene	neg
482	M221T28	7-hydroxycoumarin-4-acetic acid	pos
483	M203T261	Tryptophan	neg
484	M217T210	Demethoxycurcumin	neg
485	M221T77	Benzyl cinnamate	pos
486	M222T368	N-acetyl-d-mannosamine	pos
487	M203T282_1	Vasicinone	pos
488	M246T535	Lys-Val	pos
489	M220T222	N-acetyl-d-glucosamine	neg
490	M220T84	2,6-di-tert-butyl-4-methoxyphenol	neg
491	M221T75	Monoisobutyl phthalate	neg
492	M223T189	Flavone	pos
493	M247T240_2	Lenticin	pos
494	M225T40	3,5-dimethoxy-4-hydroxycinnamic acid	pos
495	M225T476	D-Mannose-6-phosphate	pos
496	M222T262	N-acetyl-d-galactosaminitol	neg
497	M225T139	Isopropyl 4-hydroxybenzoate	neg
498	M225T497	His-ser	pos
499	M249T352	Glu-Thr	pos
500	M218T276	Pantothenate	neg
501	M225T350	Porphobilinogen	neg
502	M249T463	Asp-Asp	pos
503	M227T112	Ile-Pro	neg
504	M252T48_2	Acetyl Tyrosine Ethyl Ester	pos
505	M253T42	N-(2,4-dinitrophenyl)-l-alanine methyl ester	pos
506	M227T50	Myristic acid	neg
507	M227T79	.epsilon.-caprolactam	pos
508	M229T106	D-ribulose 5-phosphate	neg
509	M229T403	D-ribose 1-phosphate	neg
510	M233T30	Valerenic acid	neg
511	M229T266	Aspernigrin a	pos
512	M260T58	Gly-Trp	neg
513	M235T123	5,6,7-trimethoxycoumarin	neg
514	M261T459	Asp-Glu	neg
515	M263T69	Pro-phe	pos
516	M230T129	3,3'-dimethoxybenzidine	pos
517	M267T214	Phe-thr	pos
518	M236T30_2	3-(cyclohexylamino)-2-hydroxy-1-propanesulfonic acid	neg
519	M275T461_2	Gamma-l-glutamyl-l-glutamic acid	neg
520	M277T172	Leu-Phe	neg
521	M277T370	Gamma-glutamylmethionine	neg
522	M233T141	Pyroxamide	pos
523	M268T330	N-Acetyl-L-tyrosine	pos
524	M277T38	all cis-(6,9,12)-Linolenic acid	neg
525	M235T142	Zolpidem	pos
526	M279T224	Val-Tyr	neg
527	M237T229_1	L-Gulonic gamma-lactone	neg
528	M269T298	His-Leu	pos
529	M237T369	2-keto-3-deoxyoctonic acid	neg
530	M236T331	1-(benzo[d][1,3]dioxol-4-yl)-2-(methylamino)pentan-1-one	pos
531	M269T301	Dflnha	pos
532	M237T37	Butein	pos
533	M275T369	Gln-gln	pos
534	M240T338	D-glucosamine 6-phosphate	neg
535	M241T226	(z)-2-octylpent-2-enedioic acid	neg
536	M237T396	Gly-Thr	pos
537	M283T426	Glu-His	neg
538	M239T180	3,4,5-trimethoxycinnamic acid	pos
539	M241T288	.alpha.-d-galactose 1-phosphate	neg
540	M241T38	Pentadecanoic acid	neg
541	M241T399	Glucose 1-phosphate	neg
542	M277T157	Stearidonic Acid	pos
543	M218T72	Captopril	pos
544	M243T160	Pseudouridine	neg
545	M277T450	L-Saccharopine	pos
546	M221T282_1	Indole-3-pyruvic acid	pos
547	M288T399	Ophthalmate	neg
548	M243T437	Uridine	neg
549	M243T456	L-fucose-1-phosphate	neg
550	M225T35	5-acetylamino-6-formylamino-3-methyluracil	neg
551	M241T306_1	Pheniramine	pos
552	M284T212	Oxymorphone	pos
553	M251T205	Bisphenol m	neg
554	M290T344	N-fructosyl pyroglutamate	neg
555	M251T417	Phenytoin	neg
556	M252T66	D-neopterin	neg
557	M243T239	Equol	pos
558	M243T62	Lumichrome	pos
559	M253T209	4'-methoxyflavanone	neg
560	M293T26	Cinchonine	neg
561	M245T187_1	Ile-Met	pos
562	M286T418	Hydromorphone-3-.beta.-d-glucuronide	pos
563	M253T296	2-keto-D-Gluconic acid	neg
564	M300T208	Ile-Gly-Ile	neg
565	M245T36_2	1-monolinoleoyl-rac-glycerol	pos
566	M245T442	Cytidine 5'-diphosphocholine	pos
567	M246T243	2-methylbutyryl-l-carnitine	pos
568	M253T38_2	Cis-9-palmitoleic acid	neg
569	M297T175	Met-Phe	pos
570	M255T38	Palmitic acid	neg
571	M306T567	L-glutathione, reduced	neg
572	M309T351	Gamma-glu-tyr	neg
573	M255T44	Cinnavalininate	neg
574	M247T201	Tryptophan betaine	pos
575	M302T420	Gly-Pro-Glu	pos
576	M255T53	5-ethyl-2'-deoxyuridine	neg
577	M303T413	Arg-Gln	pos
578	M304T489	Arg-glu	pos
579	M252T142	Deoxyadenosine	pos
580	M255T58	(6e)-2,6,10-trimethyldodeca-6,11-diene-2,3,10-triol	neg
581	M257T114	His-Cys	neg
582	M257T166	1-Methylpseudouridine	neg
583	M307T265	Cys-Gly-Lys	pos
584	M253T184	Deoxyinosine	pos
585	M257T85	2'-o-methyluridine	neg
586	M308T403	Glutathione	pos
587	M258T418	Ile-Lys	neg
588	M253T497	1,2,3-Benzenetriol	pos
589	M255T175_2	Ketoprofen	pos
590	M259T185	Fructose 1-phosphate	neg
591	M259T430	D-fructose 6-phosphate	neg
592	M259T485	alpha-D-Galactose 1-phosphate	neg
593	M256T36_3	Palmitamide	pos
594	M258T112	N-mesitylbicyclo[2.2.1]heptane-2-carboxamide	pos
595	M258T142	Myristamine oxide	pos
596	M323T257_2	Alpha-N-Phenylacetyl-L-glutamine	neg
597	M261T187	9-(2,3-dihydroxypropoxy)-9-oxononanoic acid	neg
598	M261T197	Sorbitol 6-phosphate	neg
599	M318T186	Trp-Ile	pos
600	M261T464	D-mannitol 1-phosphate	neg
601	M265T26	Zinniol	neg
602	M267T33	Stearaldehyde	neg
603	M267T34	Inosine	neg
604	M260T559	Diethylcarbamazine	pos
605	M325T37	[(4e)-7-acetyloxy-6-hydroxy-2-methyl-10-oxo-2,3,6,7,8,9-hexahydrooxecin-3-yl] (e)-but-2-enoate	neg
606	M263T78	Linoleic acid methyl ester	pos
607	M269T33	1-octadecanol (drug)	neg
608	M265T348	Thiamine	pos
609	M239T244	Curvulin	pos
610	M318T456	Tyr-His	pos
611	M269T61	All-trans-4-ketoretinoic acid	neg
612	M241T189	Rotenone	pos
613	M267T332	Valsartan acid	pos
614	M273T453	1-Deoxy-D-xylulose 5-phosphate	neg
615	M334T265	Trp-Met	neg
616	M328T329	Arg-Ser	pos
617	M329T171	Tyr-Met(o)	pos
618	M268T171	Adenosine	pos
619	M338T168	Tazarotenic acid sulfoxide	neg
620	M339T27	Gly-His-Lys	neg
621	M339T35_1	Dl-sulforaphane n-acetyl-l-cysteine	neg
622	M279T38	Linoleic acid	neg
623	M337T36_2	MG(18:2(9Z,12Z)/0:0/0:0)[rac]	pos
624	M281T184	2'-hydroxy-6'-methyl-3,4-methylenedioxychalcone	neg
625	M281T372_2	Ethyl glucuronide	neg
626	M338T268	Met-Gln	pos
627	M270T200	Oxotremorine	pos
628	M271T181_1	Aloe emodin	pos
629	M281T60_2	20-hydroxy-4z,7z,10z,13z,16z,18e-docosahexaenoic acid	neg
630	M272T223	Normorphine	pos
631	M273T44	Thiofanox sulfone	pos
632	M282T353	Guanosine	neg
633	M282T38_1	10-hydroxymorphine	neg
634	M283T29	Tropisetron	neg
635	M274T213	Emetine	pos
636	M283T37	Octadecanoic acid	neg
637	M274T63	Fenpropidin	pos
638	M347T580	L-Arginine	neg
639	M349T382	N-Acetyl-L-aspartic acid	neg
640	M276T483	.gamma.-L-Glu-.epsilon.-L-Lys	pos
641	M283T55	Brazilein	neg
642	M283T58	Avocadyne	neg
643	M359T53	Nicotinuric acid	neg
644	M360T234	N-arachidonoyl-l-serine	neg
645	M278T156_1	Indirubin-3'-monoxime	pos
646	M285T206_2	Hexadecanedioic acid	neg
647	M285T60	Agnuside	neg
648	M279T32	Dibutyl phthalate	pos
649	M279T58_2	Linolenic acid	pos
650	M281T142	Cyclopeptine	pos
651	M287T120_2	5z,8z,14z-eicosatrienoic acid	neg
652	M287T94_2	Trans-dehydroandrosterone	neg
653	M282T105	2'-o-methyladenosine	pos
654	M282T173	Sphingosine	pos
655	M351T457	Cys-Thr-Lys	pos
656	M289T13	(+)-catechin	neg
657	M282T35_2	Oleamide	pos
658	M289T464	D-Ribose 5-phosphate	neg
659	M357T400_1	Pyroglu-Ala-Arg	pos
660	M377T59	Neotame	neg
661	M285T348_1	Malathion	pos
662	M381T27_4	L-alaninamide, n-[2-[2-(hydroxyamino)-2-oxoethyl]-4-methyl-1-oxopentyl]-3-methyl-l-valyl-n-(2-aminoethyl)-	neg
663	M291T264	Acetoxyvalerenic acid	neg
664	M366T445	Trp(dioxidation)-Glu	pos
665	M293T37	13s-hydroperoxy-9z,11e-octadecadienoic acid	neg
666	M293T63	Embelin	neg
667	M285T39	Maackiaine	pos
668	M285T426	His-Glu	pos
669	M293T74	9s-hydroperoxy-10e,12z-octadecadienoic acid	neg
670	M286T294	Letrozole	pos
671	M371T543	Pyroglu-Ile-Lys	pos
672	M295T37	9-hydroxy-10e,12z-octadecadienoic acid	neg
673	M295T544	Propanoic acid, 3-[[[2-[(aminoiminomethyl)amino]-4-thiazolyl]methyl]thio]-	neg
674	M297T131	Ricinoleic acid	neg
675	M287T35	Benzene, 1,3-dimethoxy-5-methyl-2-[(1r,6r)-3-methyl-6-(1-methylethenyl)-2-cyclohexen-1-yl]-	pos
676	M288T40_3	Heptadecasphinganine	pos
677	M297T28	Ostruthin	neg
678	M291T429_2	Pro-Asp	pos
679	M297T39	Pristanic acid	neg
680	M297T471	D-Mannose 1-phosphate	neg
681	M299T103	9,10-dihydro-15-deoxy-.delta.12,14-prostaglandin j2	neg
682	M269T36	Fustin	neg
683	M293T79	9-hydroperoxy-10e,12z,15z-octadecatrienoic acid	pos
684	M299T341	Benzoic acid + 1o, o-hex	neg
685	M373T541	Val-Val-Arg	pos
686	M295T70	9-oxo-10e,12z-octadecadienoic acid	pos
687	M296T36	alpha-Linolenic acid	pos
688	M300T444	N-Acetylglucosamine 1-phosphate	neg
689	M296T48	Dothiepin	pos
690	M303T31	Aleuritic acid	neg
691	M385T194	2-[5-[2-[2-[5-(2-hydroxypropyl)oxolan-2-yl]propanoyloxy]propyl]oxolan-2-yl]propanoic acid	neg
692	M303T39	Arachidonic acid (peroxide free)	neg
693	M305T30	Heptanedioic acid, 1-[2-[(2-carboxyphenyl)methylene]hydrazide]	neg
694	M297T210	1-methylguanosine	pos
695	M298T98	S-methyl-5'-thioadenosine	pos
696	M305T39	11,14,17-eicosatrienoic acid, (z,z,z)-	neg
697	M380T185_1	S-lactoylglutathione	pos
698	M307T104	Fa 18:4+2o	neg
699	M307T38	8z,14z-eicosadienoic acid	neg
700	M271T54	16-hydroxyhexadecanoic acid	neg
701	M299T176	Amlexanox	pos
702	M309T26	Mestranol	neg
703	M391T392	1,3-Dimethyluric acid	neg
704	M309T38	Eicosenoic acid	neg
705	M284T191	His-Lys	pos
706	M311T28	Thymol-beta-d-glucoside	neg
707	M301T154	Etifoxine	pos
708	M311T37	Phytanic acid	neg
709	M301T35	Prallethrin	pos
710	M301T464	Temazepam	pos
711	M311T67	Fa 18:2+2o	neg
712	M312T245	Indomethacin	neg
713	M402T437	Tyr-Gly-Tyr	pos
714	M312T57	Norisoboldine	neg
715	M313T172	Octadecanedioic acid	neg
716	M302T83_2	Noroxycodone	pos
717	M303T282	1,4-piperazinediethanesulfonic acid	pos
718	M292T304	Cyproconazole	pos
719	M403T392_2	Asp-Leu-Arg	pos
720	M315T249	Benzoic acid + 2o, o-hex	neg
721	M315T81	Febuxostat	neg
722	M304T125	Benzalkonium chloride (c12)	pos
723	M317T33_1	1,4-d-xylobiose	neg
724	M405T306	1h-indazole-3-carboxamide, n-[(1s)-2-amino-2-oxo-1-(phenylmethyl)ethyl]-1-(cyclohexylmethyl)-	pos
725	M306T285	Arg-Met	pos
726	M306T36_3	N-acetylsphingosine	pos
727	M417T505	Arg-Asn-Lys	pos
728	M308T107	Dihydrocapsaicin	pos
729	M308T36	N-acetyldihydrosphingosine	pos
730	M418T169	Philanthotoxin 74	pos
731	M311T429	(-)-hydroxymatairesinol	pos
732	M317T360	1,3,6-tri-o-galloyl-.beta.-d-glucose	neg
733	M317T80	Arbutin	neg
734	M299T135_1	2,4-dimethoxy-2'-hydroxy-5'-methylchalcone	pos
735	M321T50	8-gingerol	neg
736	M321T52	15s-hydroperoxy-11z,13e-eicosadienoic acid	neg
737	M323T184_2	Hesperetin	neg
738	M323T245	Maltose	neg
739	M311T74	21-deoxycortisol	pos
740	M312T168	Norcocaine	pos
741	M431T307	Captopril disulfide	neg
742	M300T126	Phytosphingosine	pos
743	M323T31_3	5-(tetradecyloxy)-2-furoic acid	neg
744	M323T441	Uridine 5'-monophosphate	neg
745	M324T28_2	Cycloxydime	neg
746	M314T226	Ampicillin	pos
747	M315T184	2-[2-(3,4-dimethoxyphenyl)ethyl]-4-methoxy-2,3-dihydropyran-6-one	pos
748	M325T224	Methopterine	neg
749	M315T217	Picrotoxinin	pos
750	M315T28	Rofecoxib	pos
751	M316T289	Furametpyr	pos
752	M316T415	Lycopsamine n-oxide	pos
753	M325T28	Hydroquinidine	neg
754	M325T316	Lactitol	neg
755	M325T328	Pterine	neg
756	M437T276	Pantothenic acid	neg
757	M439T58	Quinapril	pos
758	M318T304	Triticonazole	pos
759	M449T33	N-acetyl-p-fluoro-dl-phenylalanine	neg
760	M326T322	Hboa + o-hex	neg
761	M311T497	1h-pyrrole-3-propanoic acid, 5-[(1,2-dihydro-2-oxo-3h-indol-3-ylidene)methyl]-2,4-dimethyl-	pos
762	M327T357	L-Fucose	neg
763	M313T162	1-Palmitoylglycerol	pos
764	M327T52_2	12-hete-[d8]	neg
765	M328T295	Lithosprmoside	neg
766	M322T497	5,8-quinolinedione, 6-chloro-7-[[2-(4-morpholinyl)ethyl]amino]-	pos
767	M329T118	11beta-hydroxyprogesterone	neg
768	M323T204	Acetylfentanyl	pos
769	M323T283	3-pyridinecarboxamide, n-(6-chloro-9h-pyrido[3,4-b]indol-8-yl)-	pos
770	M323T348	D-myo-inositol-1,3-diphosphate	pos
771	M324T458	Cytidine 5'-monophosphate	pos
772	M329T156	(z)-9,12,13-trihydroxyoctadec-15-enoic acid	neg
773	M329T33	4,2'-dihydroxy-3,4',6'-trimethoxychalcone	neg
774	M329T333	Benzoic acid + 1o, 1meo, o-hex	neg
775	M331T56	Butamifos	neg
776	M324T497_1	Thenylchlor	pos
777	M325T441	Uridine 5'-monophosphate (UMP)	pos
778	M325T451	Cellobiose	pos
779	M333T24	Daidzein 4'-sulfate	neg
780	M327T36	1,2-dihydroxyheptadec-16-yn-4-yl acetate	pos
781	M328T180	1-o-trans-cinnamoyl-beta-d-glucopyranose	pos
782	M444T176	Dihydrofolic acid	pos
783	M335T25_2	Prostaglandin b1	neg
784	M337T38	Erucic acid	neg
785	M446T441	Tetrahydrofolate	pos
786	M328T399	P-acetamidophenyl .beta.-d-glucuronide	pos
787	M313T91	9,10-dihydroxy-12z-octadecenoic acid	neg
788	M328T419_1	Diclobutrazol	pos
789	M472T278	Folinic acid	neg
790	M459T257	Raltitrexed	pos
791	M330T413	Paroxetine	pos
792	M330T70	Eicosapentaenoic Acid ethyl ester	pos
793	M319T344	Propofol .beta.-d-glucuronide	pos
794	M459T408_2	Ergothioneine	pos
795	M331T154	Nornotatic acid	pos
796	M333T206	Picroside ii	pos
797	M475T34	Thyroxine 4'-o-.beta.-d-glucuronide	neg
798	M339T38	Behenic acid	neg
799	M341T145	Hexadecanedioic acid, 3,3,14,14-tetramethyl-	neg
800	M335T216	Benzyl butyl phthalate	pos
801	M341T366_11	Sucrose	neg
802	M335T220	Strychnine	pos
803	M335T373	Nivalenol	pos
804	M335T436	(2s,3s)-3,5,7-trihydroxy-6-methyl-2-(3,4,5-trihydroxyphenyl)-2,3-dihydrochromen-4-one	pos
805	M341T398	Trehalose	neg
806	M336T465	Nicotinate d-ribonucleotide	pos
807	M341T461	Galactinol	neg
808	M336T69_1	Isopentenyladenosine	pos
809	M327T244	4'-hydroxy-2'-methyl-3,4,5-trimethoxychalcone	neg
810	M343T63	Thiamine monophosphate	neg
811	M345T208	Corticosterone	neg
812	M337T231	Benzamide, 2-[(e)-(1,4-dimethyl-2-piperazinylidene)amino]-5-nitro-n-phenyl-	pos
813	M337T256	Propanoic acid, 3-[[[4-[4-[[[1-(2-chlorophenyl)ethoxy]carbonyl]amino]-3- methyl-5-isoxazolyl]phenyl]methyl]thio]-	pos
814	M345T57	Oryzalin	neg
815	M475T219_2	Asn-Trp-Arg	pos
816	M337T37_1	Psoralidin	pos
817	M347T27_2	5s,12r-dihydroxy-6z,8e,10e,14z-eicosatetraene-1,20-dioic acid	neg
818	M337T491	Arg-Tyr	pos
819	M484T460	Karakin	pos
820	M487T250	N-(aminothioxomethyl)-5-oxo-1-propyl-2-pyrrolidineacetamide	pos
821	M349T25	Tetrahydrocorticosterone	neg
822	M339T401_1	4-demethylsimmondsin 2'-ferulate	pos
823	M492T472	Trp-Met-Arg	pos
824	M341T132_1	1-Stearoyl-rac-glycerol	pos
825	M341T163	(+)-pinoresinol	pos
826	M341T28	Phenol, 5-(1,1-dimethylheptyl)-2-[(1r,2r,5r)-5-hydroxy-2-(3-hydroxypropyl)cyclohexyl]-	pos
827	M350T394	L-tosylphenylalanyl chloromethyl ketone	neg
828	M342T189	Skimmin	pos
829	M351T269	Lipoxin a4	neg
830	M351T394	4-methylumbelliferyl .beta.-d-glucuronide	neg
831	M351T490	D-Glucuronolactone	neg
832	M343T445	4-O-.beta.-Galactopyranosyl-D-mannopyranose	pos
833	M353T27	Rauwolscine	neg
834	M353T37	Tricosanoic acid	neg
835	M344T349	Cinnamyl 3,4-dihydroxy-.alpha.-cyanocinnamate	pos
836	M353T457	6:3+6o fatty acyl hexoside	neg
837	M355T27	16-phenyltetranorprostaglandin f2.alpha.	neg
838	M357T51_1	3-hydroxy-7,8,2',3'-tetramethoxyflavone	neg
839	M344T370	Propiconazole	pos
840	M359T160	Lariciresinol	neg
841	M344T409	Neohesperidose	pos
842	M345T154	8-(3-((2-carboxypropan-2-yl)oxy)phenyl)octanoic acid	pos
843	M359T324	D-fructose	neg
844	M359T328	Benzoic acid + 1o, 2meo, o-hex	neg
845	M497T336	Chicoric acid	pos
846	M533T294	S-(2,3,4-trihydroxybutyl)mercapturic acid	neg
847	M337T162	2-linoleoylglycerol	pos
848	M360T55	3',4',5,7-tetrahydroxy-3,6,8-trimethoxyflavone	neg
849	M348T331	Adenosine monophosphate (AMP)	pos
850	M361T180	(-)-secoisolariciresinol	neg
851	M337T408	5'-phosphoribosyl-5-amino-4-imidazolecarboxamide (aicar)	neg
852	M351T181	Anisatin	pos
853	M362T108	Cefadroxil	neg
854	M542T417	Phosphoramidon	neg
855	M352T141	Trans-zeatin-riboside	pos
856	M352T234	Pirenzepine	pos
857	M339T244	Alpha-guaiaconic acid	neg
858	M353T157	Prostaglandin i2	pos
859	M353T183	Geniposide	pos
860	M363T25_3	9s,11r,15s-trihydroxy-20a,20b-dihomo-5z,13e-prostadienoic acid	neg
861	M363T33	1-methyluric acid	neg
862	M357T138	Eseroline fumarate	pos
863	M590T537	Benzoic acid, 3-[[(3-carboxycyclohexyl)amino]carbonyl]-4-[3-[4-(4-phenoxybutoxy)phenyl]propoxy]-	pos
864	M365T38	Nervonic acid	neg
865	M366T32_1	2(1h)-pyridinone, 3-[(2s,4s,5r)-5,6-dichloro-2,4-dimethyl-1-oxohexyl]-4-hydroxy-5,6-dimethoxy-	neg
866	M357T44	Pioglitazone	pos
867	M357T536	.beta.-estradiol 17-valerate	pos
868	M367T29_2	3-dehydroepiandrosterone sulfate	neg
869	M358T414	1h-indazole-1-pentanoic acid, 3-[[[1-(aminocarbonyl)-2,2-dimethylpropyl]amino]carbonyl]-	pos
870	M367T373	Isoanhydroicaritin	neg
871	M368T387	Benzoic acid, 4-[(1s)-1-[[5-chloro-2-(4-fluorophenoxy)benzoyl]amino]ethyl]-	neg
872	M369T382	Digalacturonic acid	neg
873	M371T302	Arctigenin	neg
874	M359T389	(-)-riboflavin	pos
875	M359T52	Matairesinol	pos
876	M360T153	Coniferin	pos
877	M360T219_2	Napelline	pos
878	M360T366_2	D-turanose	pos
879	M371T35	Sulindac sulfone	neg
880	M371T400	Rutinose	neg
881	M373T138	Geniposidic acid	neg
882	M375T99	7-o-benzylluteolin	neg
883	M360T398	Melibiose	pos
884	M361T303_2	Dimefuron	pos
885	M361T351	4-methylumbelliferyl .beta.-d-glucopyranoside	pos
886	M363T29	3,6,9,12-tetraoxatetracosan-1-ol	pos
887	M377T25_2	5-[1,2,4a-trimethyl-5-(propanoyloxymethyl)-2,3,4,7,8,8a-hexahydronaphthalen-1-yl]-3-methylpentanoic acid	neg
888	M364T212	Thymidine 5'-monophosphate	pos
889	M364T463	Guanosine 5'-monophosphate (GMP)	pos
890	M365T153	Homovanillic acid	pos
891	M377T27_2	16,16-dimethyl-6-ketoprostaglandin e1	neg
892	M593T183	Pantethine	pos
893	M365T497	Nigerose	pos
894	M379T258	Daunorubicin	neg
895	M366T194	Isopentenyl-adenine-7-glucoside	pos
896	M379T375	8-desoxygartanin	neg
897	M380T34_1	Benthiavalicarb-isopropyl	neg
898	M381T172	1a,1b-dihomoprostaglandin e1	neg
899	M613T493	Glutathione, oxidized	pos
900	M597T250	Phe-met-arg-phe-amide	neg
901	M381T275	1,2-dimyristoyl-sn-glycero-3-phosphate	neg
902	M367T154	Cyhexatin	pos
903	M367T218_2	Hirsuteine	pos
904	M367T401	2-[1-hydroxy-1-(4-methoxyphenyl)propan-2-yl]oxy-6-(hydroxymethyl)oxane-3,4,5-triol	pos
905	M367T408	Atovaquone	pos
906	M369T227_1	Curcumin	pos
907	M369T242	Deoxyuridine monophosphate (dUMP)	pos
908	M369T471	Aucubin	pos
909	M381T400	5-heptenoic acid, 7-[(1r,2r,3s,5s)-2-[(1e,3s)-3-(2,3-dihydro-1h-inden-2-yl)-3-hydroxy-1-propen-1-yl]-3-fluoro-5-hydroxycyclopentyl]-, (5z)-	neg
910	M370T280	Adenosine 3'-monophosphate	pos
911	M607T349	Melphalan	neg
912	M373T41	5,6,7,3',4'-pentamethoxyflavone	pos
913	M627T173_2	1(2h)-pyrimidineacetamide, n-[(1s,3s,4s)-4-[[2-(2,6-dimethylphenoxy)acetyl]amino]-3-hydroxy-5-phenyl-1-(phenylmethyl)pentyl]tetrahydro-4-hydroxy-.alpha.-(1-methylethyl)-2-oxo-, (.alpha.s)-	pos
914	M375T298	2'-hydroxy-2,4,4',5,6'-pentamethoxychalcone	pos
915	M376T34_2	Tuberostemonine	pos
916	M379T243	Pyridate	pos
917	M383T26_1	Isorhynchophylline	neg
918	M383T337	Dehydrocholic acid	neg
919	M383T391	S-adenosyl-l-homocysteine	neg
920	M629T172_1	Lopinavir	pos
921	M635T492	Glutathione disulfide	pos
922	M385T35_3	Propylpyrazoletriol	neg
923	M387T304	12:4+3o fatty acyl hexoside	neg
924	M389T381_1	Gilvocarcin v	neg
925	M391T268	Glabrol	neg
926	M381T33	Brassicasterol	pos
927	M663T406	Zanamivir	neg
928	M392T214_1	Guanidinopropionic acid	neg
929	M382T264_1	Cis-zeatin-9-glucoside	pos
930	M347T450	Acetohexamide	pos
931	M395T68	Pregnenolone sulfate	neg
932	M397T27_2	Mitragynine	neg
933	M383T185_1	Rosmarinic acid	pos
934	M385T29	6h-dibenzo[b,d]pyran, 3-(1,1-dimethylheptyl)-6a,7,10,10a-tetrahydro-1-methoxy-6,6,9-trimethyl-, (6ar,10ar)-	pos
935	M385T326	(-)-Medicarpin	pos
936	M386T337	Methanone, (4-methoxy-1-naphthalenyl)(2-methyl-1-pentyl-1h-indol-3-yl)-	pos
937	M398T161	S-Adenosylmethionine	neg
938	M399T33_4	Methanone, [6-hydroxy-1-[2-(4-morpholinyl)ethyl]-1h-indol-3-yl]-1-naphthalenyl-	neg
939	M399T388_2	4'-demethylpodophyllotoxin	neg
940	M387T52	1-o-b-d-glucopyranosyl sinapate	pos
941	M388T390	Thifensulfuron-methyl	pos
942	M401T263	Acetic acid, 2-[4-[3-(4-acetyl-3-hydroxy-2-propylphenoxy)propoxy]phenoxy]-	neg
943	M390T108	Retrorsine n-oxide	pos
944	M390T157_1	Syringin	pos
945	M401T366_2	Gentiopicroside	neg
946	M403T431	Uridine 5'-diphosphate (UDP)	neg
947	M390T390	Cefaclor	pos
948	M403T450	Maltitol	neg
949	M391T187_2	Polydatin	pos
950	M403T473	Uridine 5'-diphosphate	neg
951	M391T32_1	Dioctyl phthalate	pos
952	M391T33	Octyl-3,5-di-tert-butyl-4-hydroxyhydrocinnamate	pos
953	M403T54	Oleoside 11-methyl ester	neg
954	M395T407	Tangeritin	pos
955	M405T176	8-o-acetylharpagide	neg
956	M407T259	DL-tryptophan	neg
957	M407T27_2	Repaglinide acyl-.beta.-d-glucuronide	neg
958	M395T464	1-(4-fluorobenzyl)-n-(naphthalen-1-yl)-1h-indole-3-carboxamide	pos
959	M397T381	Phenacetine	pos
960	M348T430	Adenosine 5'-monophosphate	pos
961	M362T191	Guanosine 5'-monophosphate	neg
962	M401T243	Aloin	pos
963	M407T411	6a,12a-didehydroamorphigenin	neg
964	M402T154	Sorbitane monopalmitate - polysorbate 40 in-source fragment	pos
965	M402T290	Butachlor esa	pos
966	M671T73	1-Palmitoyl-2-linoleoyl-sn-glycero-3-phosphate	neg
967	M403T183_1	Pyrazoxyfen	pos
968	M409T157	.beta.-tocotrienol	neg
969	M409T167	Mangostine	neg
970	M395T272	Gartanin	neg
971	M735T393_1	(phenoxymethyl)penicilloic acid	neg
972	M409T29_1	Bensulfuron-methyl	neg
973	M411T333_2	4-[(2r,3r,4s,5s,6r)-3,4,5-trihydroxy-6-(hydroxymethyl)oxan-2-yl]oxypentan-2-yl (e)-3-(4-hydroxyphenyl)prop-2-enoate	neg
974	M404T178_1	N4-phthalylsulfathiazole	pos
975	M404T353	Perphenazine	pos
976	M415T429_2	(2r,3s,4s,5r,6r)-2-[[(2s,3r,4r)-3,4-dihydroxy-4-(hydroxymethyl)oxolan-2-yl]oxymethyl]-6-(2-phenylethoxy)oxane-3,4,5-triol	neg
977	M404T444	Pteryxin	pos
978	M405T112	Bergaptol	pos
979	M397T42	.beta.-sitosterol	pos
980	M405T143	Tyr-Phe	pos
981	M405T233	Furathiocarb	pos
982	M683T350	(1s,3r,4s,5r)-4-[(4-carboxy-3-hydroxy-3-methylbutanoyl)oxy]-3,5-bis({[(2e)-3-(3,4-dihydroxyphenyl)prop-2-enoyl]oxy})-1-hydroxycyclohexane-1-carboxylic acid	pos
983	M421T476	.alpha.,.alpha.'-trehalose 6-phosphate	neg
984	M423T136	Cefuroxime	neg
985	M407T151	Ginkgolide b	pos
986	M407T281	Mulberroside a	pos
987	M409T137	Beclomethasone	pos
988	M423T179	3'-hydroxyrepaglinide	neg
989	M423T48	Spiro[isobenzofuran-1(3h),9'-[9h]xanthen]-3-one, 3'-hydroxy-6'-(4-hydroxyphenoxy)-	neg
990	M424T206	1-myristoyl-2-hydroxy-sn-glycero-3-phosphoethanolamine	neg
991	M425T261_2	5a,6-anhydrotetracycline	neg
992	M411T106_2	Ursolic acid methyl ester	pos
993	M413T209	1-hydroxy vitamin d2	pos
994	M425T27_3	(2e,6e,10e)-13-[(2r)-6-hydroxy-2,8-dimethyl-3,4-dihydrochromen-2-yl]-2,6,10-trimethyltrideca-2,6,10-trienoic acid	neg
995	M413T220	Loganin	pos
996	M413T266	Bispyribac	pos
997	M425T36	Lanosterol	neg
998	M413T302_2	Bisindolylmaleimide i	pos
999	M414T457_2	Echimidine n-oxide	pos
1000	M415T350	Pyraflufen-ethyl	pos
1001	M415T39	Ascorbic acid 6-palmitate	pos
1002	M417T298	Daidzin	pos
1003	M787T394	Phomopsin a	neg
1004	M729T391	Glycine, n,n'-[1,2-ethanediylbis(oxy-2,1-phenylene)]bis[n-[2-[(acetyloxy)methoxy]-2-oxoethyl]-, 1,1'-bis[(acetyloxy)methyl] ester	pos
1005	M427T178	Estrone glucuronide	neg
1006	M419T281	Aloin A	pos
1007	M429T30	alpha-Tocopherol (Vitamin E)	neg
1008	M419T300_3	Isoliquiritin	pos
1009	M429T33_4	7.alpha.-hydroxy-3-oxo-4-cholestenoic acid	neg
1010	M429T340	Ketoprofen .beta.-d-glucuronide	neg
1011	M88T348	Sarcosine	neg
1012	M431T33_3	3.beta.,7.alpha.-dihydroxy-5-cholestenoic acid	neg
1013	M421T216	Rhaponticin	pos
1014	M421T263_1	(5-benzoyloxy-4,6-dihydroxy-3-methoxycyclohexen-1-yl)methyl benzoate	pos
1015	M423T205	Candesartan cilexetil	pos
1016	M425T284	Nobiletin	pos
1017	M431T342	Osmanthuside h	neg
1018	M428T430_4	Adenosine 5'-diphosphate	pos
1019	M429T130	Isomajdine	pos
1020	M433T116	Prunin	neg
1021	M430T401_1	Tubacin	pos
1022	M431T109_1	Trifloxystrobin	pos
1023	M431T220	Eurycomanone	pos
1024	M434T51_3	N-acetyl-s-geranylgeranyl-l-cysteine	neg
1025	M435T180	1-[2,4-dihydroxy-3-[(2s,3r,4r,5s,6r)-3,4,5-trihydroxy-6-(hydroxymethyl)oxan-2-yl]phenyl]-2-hydroxy-3-(4-hydroxyphenyl)propan-1-one	neg
1026	M431T242	Khelloside	pos
1027	M431T426	Androsterone glucuronide	pos
1028	M435T336_2	Irisxanthone	neg
1029	M84T375	1-Aminocyclopropanecarboxylic acid	pos
1030	M432T164_1	Trifluperidol	pos
1031	M399T284_2	Loganic acid	pos
1032	M439T294	5-hydroxy-l-tryptophan	neg
1033	M433T204	Isovitexin	pos
1034	M439T375	Candesartan	neg
1035	M433T34_1	Chaetoviridin a	pos
1036	M439T38	Roburic acid	neg
1037	M435T329_2	Naringenin-7-o-glucoside	pos
1038	M437T251	1-Oleoyl-L-.alpha.-lysophosphatidic acid	pos
1039	M441T372	Cortisol 21-sulfate	neg
1040	M444T177	Borrelidin	neg
1041	M444T430	Adenosine 5'-phosphosulfate	neg
1042	M445T110	Trifolirhizin	neg
1043	M437T34_2	Alisol b acetate	pos
1044	M438T215	2-(r)-[1-(r)-(3,5-bis(trifluoromethyl)phenyl)ethoxy]-3-(s)-fluorophenylmorpholine	pos
1045	M439T213_2	Spironolactone	pos
1046	M439T428	(2r,3s,4s,5r,6r)-5-[(2s,3r,4r)-3,4-dihydroxy-4-(hydroxymethyl)oxolan-2-yl]oxy-2-(hydroxymethyl)-6-(2-phenylethoxy)oxane-3,4-diol	pos
1047	M90T347	Alanine	pos
1048	M445T296	Swertisin	neg
1049	M440T158_1	N-trifluoroacetyl deacetylcolchiceine	pos
1050	M441T301	Ginkgolide c	pos
1051	M445T36_1	(z)-2,6-dimethyl-7-(4-methyl-5-oxooxolan-2-yl)-3-[[3,4,5-trihydroxy-6-(hydroxymethyl)oxan-2-yl]oxymethyl]hept-5-enoic acid	neg
1052	M441T36_3	Oleoylserotonin	pos
1053	M443T129	Cinobufagin	pos
1054	M409T253	1-hexadecanoyl-2-sn-glycero-3-phosphate	neg
1055	M449T125	5.alpha.-androstan-3.alpha.,17.beta.-diol-o-3-.beta.-glucuronic acid	neg
1056	M90T418	L-Alanine	pos
1057	M443T263	(-)-catechin gallate	pos
1058	M443T36_4	Testosterone decanoate	pos
1059	M421T369	Methyl (1s,4as,6r,7s,7as)-5,6-dihydroxy-7-(hydroxymethyl)-1-[(2s,3r,4s,5s,6r)-3,4,5-trihydroxy-6-(hydroxymethyl)oxan-2-yl]oxy-1,4a,5,6,7,7a-hexahydrocyclopenta[c]pyran-4-carboxylate	neg
1060	M445T284_1	Lamiide	pos
1061	M438T30	5-hexenoic acid, 6-[(2r,3s)-3-[[[(4-chloro-2-methylphenyl)sulfonyl]amino]methyl]bicyclo[2.2.2]oct-2-yl]-, (5z)-	neg
1062	M449T356	Deoxyrhapontin	neg
1063	M92T296	Alanine-2,3,3,3-d4	neg
1064	M451T88	Carbidopa	neg
1065	M447T348	N,n'-diacetylchitobiose	pos
1066	M445T370	Tetracycline	pos
1067	M452T33_1	7-hydroxyfluphenazine	neg
1068	M449T169_2	Isosakuranin	pos
1069	M449T204	Cratoxyarborenone e	pos
1070	M453T135	Oleanonic acid	neg
1071	M449T234	Luteolin 7-glucoside	pos
1072	M453T299	Liquiritin	neg
1073	M450T394	Aripiprazole	pos
1074	M451T218	Astilbin	pos
1075	M451T348	Acyclovir	pos
1076	M453T51_1	Silybin	neg
1077	M455T106	Oleanolic acid	neg
1078	M459T308	Podophyllotoxin	neg
1079	M461T158	Homoplantaginin	neg
1080	M453T259	Silychristin	pos
1081	M463T26	Pristimerin	neg
1082	M463T260_2	[(4r,5s,6r,6as,7r,10ar,11br)-5-acetyloxy-6-hydroxy-10a-methoxy-4,7,11b-trimethyl-9-oxo-1,2,3,4a,5,6,6a,7,11,11a-decahydronaphtho[2,1-f][1]benzofuran-4-yl]methyl acetate	neg
1083	M453T343	2-pyrimidinecarboxamide, hexahydro-n-hydroxy-1,3-bis[(4-methoxyphenyl)sulfonyl]-5,5-dimethyl-	pos
1084	M453T396	4'-o-.beta.-d-glucosyl-5-o-methylvisamminol	pos
1085	M463T261	Quercetin 3-glucoside	neg
1086	M463T287	1.alpha.-methyl-5.alpha.-androstan-3.alpha.,17.beta.-diol glucuronide	neg
1087	M454T202	1-palmitoyl-2-hydroxy-sn-glycero-3-phosphoethanolamine	pos
1088	M463T290	Hyperoside	neg
1089	M454T339	1-butanol, 2-[[9-(1-methylethyl)-6-[[[4-(2-pyridinyl)phenyl]methyl]amino]-9h-purin-2-yl]amino]-, (2r)-	pos
1090	M465T26	Cholesteryl sulfate	neg
1091	M455T332_1	[3-hydroxy-1-(4-methoxy-7-oxofuro[3,2-g]chromen-9-yl)oxy-3-methylbutan-2-yl] (e)-2-methylbut-2-enoate	pos
1092	M455T347	Cefazolin	pos
1093	M467T117	Glabrolide	neg
1094	M469T207	G(8-o-4)fa sulfate	neg
1095	M469T307	Limonin	neg
1096	M471T297	Deoxynivalenol 3-glucuronide	neg
1097	M471T32_3	Echinocystic acid	neg
1098	M455T429	Methotrexate	pos
1099	M99T430	2-hydroxyethyl acrylate	pos
1100	M456T213	Octanoic acid, 2-[[4-([1,1'-biphenyl]-4-ylamino)-6-chloro-2-pyrimidinyl]thio]-	pos
1101	M457T393_1	Flavin mononucleotide (fmn)	pos
1102	M103T237	Beta-hydroxybutyrate	neg
1103	M473T342	Garcinone c	neg
1104	M459T233	Phlorizin	pos
1105	M103T395	3-hydroxybutyric acid	neg
1106	M129T180	L-2-hydroxyglutaric acid	neg
1107	M447T204_2	Quercitrin	neg
1108	M463T301	Peonidin 3-galactoside cation	pos
1109	M463T374	Tectoridin	pos
1110	M464T219	Benzamide, n-[5-[2-(3,5-dimethoxyphenyl)ethyl]-1h-pyrazol-3-yl]-4-[(3r,5s)-3,5-dimethyl-1-piperazinyl]-, rel-	pos
1111	M465T215_2	Neohesperidin	pos
1112	M473T393	Suxibuzone	neg
1113	M465T412	Catalposide	pos
1114	M466T333	Propaquizafop	pos
1115	M467T336	Cyhalothrin	pos
1116	M131T129_2	6-hydroxyhexanoate	neg
1117	M476T201_2	1-(9z,12z-octadecadienoyl)-2-hydroxy-sn-glycero-3-phosphoethanolamine	neg
1118	M477T353	Isorhamnetin-3-o-glucoside	neg
1119	M467T396	11,17-difuroatemometasone	pos
1120	M468T201_2	1-myristoyl-sn-glycero-3-phosphocholine	pos
1121	M470T415	Nefazodone	pos
1122	M471T239	18.beta.-glycyrrhetinic acid	pos
1123	M471T355	Evodin	pos
1124	M478T168	1-oleoyl-sn-glycero-3-phosphoethanolamine	neg
1125	M473T329_2	Marein	pos
1126	M473T374	Sofalcone	pos
1127	M475T106	Vandetanib	pos
1128	M483T159_2	1-palmitoyl-2-hydroxy-sn-glycero-3-phospho-(1'-rac-glycerol)	neg
1129	M133T405_2	Malate	neg
1130	M448T389	Sulprostone	pos
1131	M479T219	Triamcinolone diacetate	pos
1132	M483T259	[(2r,3s,4s,5r,6r)-3,4,5-trihydroxy-6-[2-(3-hydroxy-5-oxooxolan-3-yl)propoxy]oxan-2-yl]methyl (e)-3-(3,4-dihydroxyphenyl)prop-2-enoate	neg
1133	M485T231	Andrastin a	neg
1134	M481T266	2,3-dehydrosilybin a	pos
1135	M481T426	Albiflorin	pos
1136	M482T199_2	1-pentadecanoyl-sn-glycero-3-phosphocholine	pos
1137	M485T29	Kendomycin	neg
1138	M485T340	Rutaevin	neg
1139	M487T277	Biotin	neg
1140	M483T108	Octapropylene glycol	pos
1141	M483T183	(2r,3s,4s,5r,6r)-2-[[(2s,3r,4r)-3,4-dihydroxy-4-(hydroxymethyl)oxolan-2-yl]oxymethyl]-6-[4-(4-hydroxyphenyl)butan-2-yloxy]oxane-3,4,5-triol	pos
1142	M483T228_2	Tetrahydro-l-biopterin	pos
1143	M483T418	Paeonolide	pos
1144	M487T373	Blood group b trisaccharide	neg
1145	M487T458	Oxyresveratrol	neg
1146	M133T576	L-Malic acid	neg
1147	M485T410	Disialyllactose	pos
1148	M491T167	Aurantio-obtusin beta-d-glucoside	neg
1149	M147T267	3-hydroxyglutaric acid	neg
1150	M491T271	Propanoic acid, 2-[[4-[2-[[[(2,4-difluorophenyl)amino]carbonyl]heptylamino]ethyl]phenyl]thio]-2-methyl-	neg
1151	M494T40	alpha.-ergocryptine	neg
1152	M487T215	Enhydrin	pos
1153	M487T240	Cytidine	pos
1154	M147T435	(S)-2-Hydroxyglutarate	neg
1155	M487T346	2,4-imidazolidinedione, 1,3-bis(4-bromophenyl)-5-phenyl-	pos
1156	M495T134	(1s,4as,7s,7as)-7-hydroxy-7-methyl-1-[(2s,3r,4s,5s,6r)-3,4,5-trihydroxy-6-[(4-hydroxybenzoyl)oxymethyl]oxan-2-yl]oxy-4a,5,6,7a-tetrahydro-1h-cyclopenta[c]pyran-4-carboxylic acid	neg
1157	M487T389	Estriol 16alpha-(beta-d-glucuronide)	pos
1158	M487T451	3.alpha.,6.alpha.-mannotriose	pos
1159	M495T157	1-(10z-heptadecenoyl)-sn-glycero-3-phospho-(1'-rac-glycerol)	neg
1160	M495T427	Pyridoxamine 5-phosphate	neg
1161	M488T140	Glycerol tricaprylate	pos
1162	M497T135	Poricoic acid a	neg
1163	M497T28_3	Ganoderic acid a	neg
1164	M489T442	Cytidine 5'-diphosphocholine (CDP-choline)	pos
1165	M491T242	3',4',6-trimethoxyisoflavone-7-o-.beta.-d-glucopyranoside	pos
1166	M159T131	3-hydroxyoctanoic acid	neg
1167	M461T392_1	Kotanin	pos
1168	M497T403	Verproside	neg
1169	M493T24	Novaluron	pos
1170	M493T426	3beta-hydroxydeoxodihydrodeoxygedunin	pos
1171	M496T197_2	1-palmitoyl-sn-glycero-3-phosphocholine	pos
1172	M498T304	Lsta	neg
1173	M497T282_1	Dapsone	pos
1174	M167T29	p-Hydroxymandelic acid	neg
1175	M498T352	Codeine-6-.beta.-d-glucuronide	pos
1176	M499T422	Silydianin	neg
1177	M499T284	Isochlorogenic acid b	pos
1178	M499T457	Mundulone acetate	pos
1179	M478T201_2	4-[5-[[4-[5-[acetyl(hydroxy)amino]pentylamino]-4-oxobutanoyl]-hydroxyamino]pentylamino]-4-oxobutanoic acid	pos
1180	M499T500	13,14-epoxyfluprostenol isopropyl ester	pos
1181	M503T28_4	Madecassic acid	neg
1182	M501T323	Flavine mononucleotide	pos
1183	M501T353	Isorhamnetin 3-galactoside	pos
1184	M503T403	Hypericin	neg
1185	M506T591	Calcimycin	pos
1186	M507T285	2,4,11,13-tetraazatetradecanediamide, n1,n14-bis(4-chlorophenyl)-3,12-diimino-	pos
1187	M507T347	Metaflumizone	pos
1188	M509T228	Syringetin 3-galactoside	pos
1189	M503T449_2	Raffinose	neg
1190	M492T73_1	Cevadine	pos
1191	M511T25	2'-fucosyllactose	pos
1192	M503T484	Maltotetraose	neg
1193	M504T340	Ampkinone	neg
1194	M511T329	Bromadiolone	pos
1195	M507T27_2	3-furancarboxylic acid, tetrahydro-4-methylene-2-octyl-5-oxo-, (2r,3s)-	neg
1196	M500T77_2	.beta.-d-glucopyranosiduronic acid, 4-[3-(1-naphthalenylcarbonyl)-1h-indol-1-yl]butyl	neg
1197	M513T179	Glimepiride	pos
1198	M513T33_1	N-myristoylsphinganine	pos
1199	M509T155	1-oleoyl-2-hydroxy-sn-glycero-3-phospho-(1'-rac-glycerol)	neg
1200	M514T332	Harringtonine	pos
1201	M515T186_1	Nomilin	pos
1202	M515T205_1	Cynarin	neg
1203	M517T238	[6-[3,4-dihydroxy-2,5-bis(hydroxymethyl)oxolan-2-yl]oxy-3,4,5-trihydroxyoxan-2-yl]methyl (e)-3-(4-hydroxy-3-methoxyphenyl)prop-2-enoate	neg
1204	M179T159	(+)-dimethyl l-tartrate	pos
1205	M515T349	Isopimpinellin	pos
1206	M517T480	Sibiricose a5	neg
1207	M515T407	Telmisartan	pos
1208	M517T220	Rottlerin	pos
1209	M519T247_2	3,5-dihydroxy-2-(4-hydroxyphenyl)-6-(3-methylbut-2-enyl)-7-[3,4,5-trihydroxy-6-(hydroxymethyl)oxan-2-yl]oxy-2,3-dihydrochromen-4-one	pos
1210	M519T427	D-glucosamine 1-phosphate	pos
1211	M520T195_2	Lpc 18:2	pos
1212	M521T211	Anthocyanidin base+3o, o-malonylhex	pos
1213	M523T28	Asiatic acid	neg
1214	M522T450_3	Maltotriose	pos
1215	M524T193_4	1-stearoyl-2-hydroxy-sn-glycero-3-phosphocholine	pos
1216	M525T28_2	(2s,3r,5r,10r,13r,14s,17s)-2,3,14-trihydroxy-10,13-dimethyl-17-[(2r,3r)-2,3,6-trihydroxy-6-methylheptan-2-yl]-2,3,4,5,9,11,12,15,16,17-decahydro-1h-cyclopenta[a]phenanthren-6-one	neg
1217	M524T332	Acrinathrin	pos
1218	M524T376	Penfluridol	pos
1219	M525T345_1	10,10'-oxybis(phenoxarsine)	pos
1220	M525T349_3	Benzenepropanoic acid, 5-(3-carboxybenzoyl)-2-[[(5e)-6-(4-methoxyphenyl)-5-hexen-1-yl]oxy]-	pos
1221	M527T260	Tremulacin	neg
1222	M526T387	Epirubicin	pos
1223	M527T292	.beta.-estradiol-3-glucuronide-17-sulfate	neg
1224	M527T329	3'-fucosyllactose	pos
1225	M527T450_4	Melezitose	pos
1226	M529T205	Trans-hydroxyglimepiride	pos
1227	M531T291	Proscillaridin	pos
1228	M531T306	Ketoconazole	pos
1229	M532T331_1	1- piperidinecarboxylic acid, 4-[bis(1,3-benzodioxol-5-yl)hydroxymethyl]-, 2,2,2-trifluoro-1-(trifluoromethyl)ethyl ester	pos
1230	M529T300	Harpagoside	neg
1231	M508T381_1	(methylsulfonyl)octyl glucosinolate	neg
1232	M529T32_1	Kukoamine a	neg
1233	M535T301	Flavone base + 3o, c-pen, c-pen	pos
1234	M531T182	Phytolaccagenin	neg
1235	M537T38	2-mohpda [dmed-fahfa]	pos
1236	M540T162_2	(2r,3r,4s,5s,6r)-2-[[7-hydroxy-1-(4-hydroxy-3-methoxyphenyl)-3-(hydroxymethyl)-6-methoxy-1,2,3,4-tetrahydronaphthalen-2-yl]methoxy]-6-(hydroxymethyl)oxane-3,4,5-triol	pos
1237	M203T292	3,5-dihydroxydecanoic acid	neg
1238	M509T450	3'-galactosyllactose	pos
1239	M533T299	Aprepitant .beta.-glucuronide (position of glucuronide on triazolone ring uncertain)	neg
1240	M541T466	Cadusafos	pos
1241	M542T434	ADP-ribose	pos
1242	M535T154	Senegenin	neg
1243	M533T212	6''-o-malonylglycitin	pos
1244	M541T165_2	Atorvastatin	pos
1245	M544T269	1-oleoyl-sn-glycero-3-phosphocholine	pos
1246	M545T185_1	5-heptenoic acid, 7-[(1r,2r,3r,5s)-3,5-dihydroxy-2-[(3r)-3-hydroxy-5-phenylpentyl]cyclopentyl]-, 4-(3-thioxo-3h-1,2-dithiol-5-yl)phenyl ester, (5z)-	pos
1247	M545T399	Iridin	pos
1248	M539T342	Selaginpulvilin o	neg
1249	M547T210	[4a,7-dihydroxy-7-methyl-1-[3,4,5-trihydroxy-6-(hydroxymethyl)oxan-2-yl]oxy-1,5,6,7a-tetrahydrocyclopenta[c]pyran-5-yl] (e)-3-(4-methoxyphenyl)prop-2-enoate	pos
1250	M548T158	1-o-octadecyl-sn-glyceryl-3-phosphorylcholine	pos
1251	M540T434	Cyclic adenosine diphosphate ribose	neg
1252	M543T356	4-methoxy-6-[2-(4-methoxyphenyl)ethyl]pyran-2-one	pos
1253	M552T243	Histidine conjugated chenodeoxycholic acid	pos
1254	M542T175	Doxorubicin	neg
1255	M215T216	3-hydroxydodecanoic acid	neg
1256	M553T180	4-(2-oxo-1,2,3,4-tetrahydroquinolin-6-yl)oxycilostazol	pos
1257	M555T420	Didansyl-1,4-diaminobutane	pos
1258	M556T403	Lithospermic acid	pos
1259	M543T389	Trans-carboxyglimepiride	pos
1260	M557T295	Aprepitant	pos
1261	M559T302	Gomisin c	pos
1262	M550T191	1-O-(cis-9-Octadecenyl)-2-O-acetyl-sn-glycero-3-phosphocholine	pos
1263	M561T398	(1s,4as,7s,7as)-1-[(2s,3r,4s,5s,6r)-6-[[(e)-3-(3,4-dihydroxyphenyl)prop-2-enoyl]oxymethyl]-3,4,5-trihydroxyoxan-2-yl]oxy-7-hydroxy-7-methyl-4a,5,6,7a-tetrahydro-1h-cyclopenta[c]pyran-4-carboxylic acid	pos
1264	M563T310	Oleuropein	pos
1265	M545T378	Hypocrellin a	neg
1266	M564T378_1	Thiocolchicoside	pos
1267	M547T267	5,7-dihydroxy-2-phenyl-6-[3,4,5-trihydroxy-6-(hydroxymethyl)oxan-2-yl]-8-(3,4,5-trihydroxyoxan-2-yl)chromen-4-one	neg
1268	M547T278_2	Antimycin a	neg
1269	M565T329	Flavone base + 3o, c-hex, c-pen	pos
1270	M565T429	Cornuside	pos
1271	M571T280	Benzoylstaurosporine	pos
1272	M572T414	.beta.-d-glucopyranosiduronic acid, 5-[3-(1-naphthalenylcarbonyl)-1h-indol-1-yl]pentyl	pos
1273	M557T165	Arctiin	pos
1274	M549T375_2	Benzoylnorecgonine	neg
1275	M573T289	(-)-oxypeucedanin	pos
1276	M573T386	Genipin-gentiobioside	pos
1277	M549T446	Gentianose	neg
1278	M89T269	Dl-lactate	neg
1279	M573T39_2	2-sdahma [dmed-fahfa]	pos
1280	M574T381_1	Bosentan	pos
1281	M575T229	2-[[7-hydroxy-1-(4-hydroxy-3,5-dimethoxyphenyl)-3-(hydroxymethyl)-6,8-dimethoxy-1,2,3,4-tetrahydronaphthalen-2-yl]methoxy]oxane-3,4,5-triol	pos
1282	M575T381	Tenofovir	pos
1283	M559T37_2	Fahfa 36:3	neg
1284	M577T398	Saponarin	pos
1285	M561T123	Protoporphyrin ix	neg
1286	M559T389	Cidofovir	pos
1287	M581T28	Sciadopitysin	pos
1288	M563T328	Schaftoside	neg
1289	M582T416	Benzeneacetic acid, 3-[3-[[[2-chloro-3-(trifluoromethyl)phenyl]methyl](2,2-diphenylethyl)amino]propoxy]-	pos
1290	M565T419	Ginkgetin	neg
1291	M583T232	Crufomate	pos
1292	M569T446_1	3-[5,7-dihydroxy-2-(4-methoxyphenyl)-4-oxo-2,3-dihydrochromen-3-yl]-5,7-dihydroxy-2-(4-methoxyphenyl)-2,3-dihydrochromen-4-one	neg
1293	M573T136	Oligomycin a	neg
1294	M586T378	.beta.-d-glucopyranosiduronic acid, 6-[3-(1-naphthalenylcarbonyl)-1h-indol-1-yl]hexyl	pos
1295	M589T290	(4s,5z,6s)-5-[2-[(e)-3-(4-hydroxyphenyl)prop-2-enoyl]oxyethylidene]-4-(2-methoxy-2-oxoethyl)-6-[(2s,3r,4s,5s,6r)-3,4,5-trihydroxy-6-(hydroxymethyl)oxan-2-yl]oxy-4h-pyran-3-carboxylic acid	pos
1296	M89T307	.beta.-hydroxypropionic acid	neg
1297	M592T217	Ergoloidmesylat	pos
1298	M115T208	Alpha-ketoisovaleric acid	neg
1299	M574T32	Sulfobacin b	neg
1300	M576T282	Cis-moxifloxacin acyl-.beta.-d-glucuronide	neg
1301	M129T341	4-ketopimelic acid	pos
1302	M593T240	Pheophorbide a	pos
1303	M573T212_3	Oleana-1,9(11)-dien-28-amide, 2-cyano-3,12-dioxo-n-(2,2,2-trifluoroethyl)-	pos
1304	M595T417	7-methylguanosine	pos
1305	M579T165	Hematoporphyrin	neg
1306	M599T464	Methyl 5,6-diacetyloxy-10-hydroxy-2,4b,7,7,10a,12a-hexamethyl-12-methylidene-1,4,8-trioxo-4a,5,6,6a,9,10,10b,11-octahydronaphtho[1,2-h]isochromene-2-carboxylate	pos
1307	M599T528	4-[3,4,5-trihydroxy-6-(hydroxymethyl)oxan-2-yl]oxy-9-(3,4,5-trimethoxyphenyl)-5a,6,8a,9-tetrahydro-5h-[2]benzofuro[6,5-f][1,3]benzodioxol-8-one	pos
1308	M577T297	Rhoifolin	neg
1309	M577T466	Gossypol	neg
1310	M600T39	1,2-dilinoleoylglycerol	pos
1311	M601T407	Hydrangenoside c	pos
1312	M579T223	Cucurbitacin e	pos
1313	M581T376	Naringin dihydrochalcone	neg
1314	M601T487	(3s,4s)-5-[(3s,4s)-4,10-dihydroxy-7,9-dimethoxy-3-methyl-3,4-dihydro-1h-benzo[g]isochromen-5-yl]-7,9-dimethoxy-3-methyl-3,4-dihydro-1h-benzo[g]isochromene-4,10-diol	pos
1315	M602T281	Montelukast sulfoxide	pos
1316	M602T594	1-palmitoyl-2-oleoyl-3-linoleoyl-rac-glycerol	pos
1317	M603T204	Morphine n-oxide	pos
1318	M603T329	Leucoside	pos
1319	M604T160	1,2-dioleoyl-sn-glycerol	pos
1320	M605T107	(5.alpha.)-androstane-3,11,17-trione	pos
1321	M605T412	Enterodiol	pos
1322	M607T204_2	Terragine e	pos
1323	M609T263_1	Reserpine	pos
1324	M609T266	Spinosine	pos
1325	M60T271	Trimethylamine	pos
1326	M613T32	Dilinolenin (9c,12c,15c)	pos
1327	M583T482	Stauprimide	neg
1328	M613T419	Herbimycin a	pos
1329	M129T186	Dihydroxyfumarate	neg
1330	M615T304	Fortunellin	pos
1331	M595T249	Ganoderic acid h	pos
1332	M617T328_2	Poncirin	pos
1333	M583T493	Neomangiferin	neg
1334	M585T178	1-(1,2-dioctanoylphosphatidyl)inositol	neg
1335	M588T431	GDP-L-Fucose	neg
1336	M593T346	Lonicerin	neg
1337	M617T390	Kaempferol-3-glucoside-3''-rhamnoside	pos
1338	M129T294	2-ketohexanoic acid	neg
1339	M597T384	Eriocitrin	pos
1340	M601T33_1	Garcinol	neg
1341	M601T430	N-acetyl-d-glucosamine 6-phosphate	neg
1342	M619T303_1	(4s,5z,6s)-5-[2-[(e)-3-(4-hydroxy-3-methoxyphenyl)prop-2-enoyl]oxyethylidene]-4-(2-methoxy-2-oxoethyl)-6-[(2s,3r,4s,5s,6r)-3,4,5-trihydroxy-6-(hydroxymethyl)oxan-2-yl]oxy-4h-pyran-3-carboxylic acid	pos
1343	M619T384	Eriodictyol 7-o-neohesperidoside	pos
1344	M620T232	N-[(2s)-2-[[(1z)-1-methyl-3-oxo-3-[4-(trifluoromethyl)phenyl]-1-propen-1-yl]amino]-3-[4-[2-(5-methyl-2-phenyl-4-oxazolyl)ethoxy]phenyl]propyl]propanamide	pos
1345	M621T406	Jacaglabroside b	pos
1346	M605T225	Chlorambucil	neg
1347	M606T432	UDP-N-acetylglucosamine	neg
1348	M623T434	N-acetylneuraminic acid dimer	pos
1349	M617T249	(2r,3s,4s,5r,6r)-6-[1,7-bis(4-hydroxyphenyl)heptan-3-yloxy]-5-[(2s,3r,4r)-3,4-dihydroxy-4-(hydroxymethyl)oxolan-2-yl]oxy-2-(hydroxymethyl)oxane-3,4-diol	pos
1350	M609T338	Rutin	neg
1351	M625T304	Dauricine	pos
1352	M625T414	Isorhamnetin 3-neohesperidoside	pos
1353	M613T172_2	3-[(cholamidopropyl)dimethylammonio]-1-propanesulfonate	neg
1354	M625T480	Peonidin-3,5-o-di-beta-glucoside	pos
1355	M159T137_2	2-oxoadipic acid	neg
1356	M627T376	[(1s,4as,6s,7r,7as)-6-acetyloxy-4-[[(2r,3r,4s,5s,6r)-3-acetyloxy-4,5-dihydroxy-6-(hydroxymethyl)oxan-2-yl]oxymethyl]-7-(acetyloxymethyl)-7-hydroxy-4a,5,6,7a-tetrahydro-1h-cyclopenta[c]pyran-1-yl] 3-methylbutanoate	pos
1357	M614T229	Hexosyl lpe 16:0	neg
1358	M87T280	Pyruvate	neg
1359	M618T35	N-palmitoyl-d-erythro-dihydroceramide-1-phosphate	neg
1360	M618T162	1-palmitoyl-2-oleoyl-sn-glycerol	pos
1361	M631T346_1	Diosmin	pos
1362	M123T267	Ethyl hydrogen methylphosphonate	neg
1363	M619T394	Phosphonic acid, p-[2-[3-[[(1-benzoyl-4-piperidinyl)methylamino]carbonyl]-2-naphthalenyl]-1-(1-naphthalenyl)-2-oxoethyl]-	neg
1364	M621T476	4'-o-(glca(1-2)glca) apigenin	neg
1365	M641T421	(3z)-5-[(2,6-dichlorobenzyl)sulfonyl]-3-[(3,5-dimethyl-4-{[(2r)-2-(1-pyrrolidinylmethyl)-1-pyrrolidinyl]carbonyl}-1h-pyrrol-2-yl)methylene]-1,3-dihydro-2h-indol-2-one	pos
1366	M623T233_1	Isorhamnetin-3-o-rutinoside	neg
1367	M632T394	6'-sialyllactose	neg
1368	M643T414	Neohesperidose heptaacetate	pos
1369	M637T39	Decahydrogambogic acid	neg
1370	M639T418	Plantamajoside	neg
1371	M647T138_2	1,2-dihexadecanoyl-sn-glycero-3-phosphate	neg
1372	M645T245	Pectolinarin	pos
1373	M645T466	[(2r,3s,4s,5r,6r)-6-[1,7-bis(4-hydroxyphenyl)-5-oxoheptan-3-yl]oxy-3,4,5-trihydroxyoxan-2-yl]methyl (e)-3-(4-hydroxyphenyl)prop-2-enoate	pos
1374	M646T402	Aconitine	pos
1375	M647T276	Acteoside	pos
1376	M648T410	Pyribenzoxim	pos
1377	M653T347	Leiocarposide	pos
1378	M649T465	N-glycolylneuraminic acid	neg
1379	M651T33_1	2,3-dinor-8-isoprostaglandin-f2.alpha.	neg
1380	M653T419	Bilobalide	pos
1381	M655T412	2-thiophenecarboxamide, n-[[4'-[[3-butyl-1,5-dihydro-5-oxo-1-[2-(trifluoromethyl)phenyl]-4h-1,2,4-triazol-4-yl]methyl][1,1'-biphenyl]-2-yl]sulfonyl]-3-methyl-	pos
1382	M655T456	Coproporphyrin I	pos
1383	M657T227	Fulvestrant 9-sulfone	neg
1384	M658T230	Tubeimoside a	neg
1385	M662T434	.beta.-nicotinamide adenine dinucleotide(NAD)	neg
1386	M137T461	Phosphomycin	neg
1387	M659T103	7-(triethylsilyl)-10-deacetylbaccatin iii	pos
1388	M555T83	Tetradecylphosphonate	neg
1389	M665T38	(2e,4e)-12-[(10e,12e)-13-carboxy-3-hydroxy-2-(hydroxymethyl)-8,10,12-trimethyltrideca-10,12-dienoyl]oxy-13-(hydroxymethyl)-3,5,7-trimethyltetradeca-2,4-dienedioic acid	neg
1390	M659T341	9-methoxy-7-[4-[3,4,5-trihydroxy-6-[[3,4,5-trihydroxy-6-(hydroxymethyl)oxan-2-yl]oxymethyl]oxan-2-yl]oxyphenyl]-[1,3]dioxolo[4,5-g]chromen-8-one	pos
1391	M665T496_2	Stachyose	neg
1392	M671T193_3	1-Hexadecanoyl-2-(9Z,12Z-octadecadienoyl)-sn-glycero-3-phosphoric acid	neg
1393	M662T54	Dodecanamide, n-[(1s,2r)-2-hydroxy-1-(hydroxymethyl)heptadecyl]-12-[(7-nitro-2,1,3-benzoxadiazol-4-yl)amino]-	pos
1394	M153T283	O,o-diethyl phosphate	neg
1395	M629T245	Octadecamethyloctasiloxane	pos
1396	M664T434	Nicotinamide adenine dinucleotide (NAD)	pos
1397	M674T286	Lewis b tetrasaccharide	neg
1398	M679T67	Dipyridamole mono-o-.beta.-d-glucuronide	neg
1399	M680T399	Acarbose	neg
1400	M666T170	Cer 22:1-d7 (d18:1-d7/22:1)	pos
1401	M666T240	1-palmitoyl-2-azelaoylphosphatidylcholine	pos
1402	M669T338	Becatecarin	pos
1403	M211T221	(s)-dibutyl 3-hydroxybutyl phosphate	pos
1404	M671T497	Fenamiphos sulfone	pos
1405	M683T366_5	Isomaltose	neg
1406	M675T374	Blood group h disaccharide	pos
1407	M676T371	Lewis y tetrasaccharide	pos
1408	M683T449	Palatinose	neg
1409	M695T31_5	S4:18(p3:16/f1:2)	neg
1410	M707T77	Prostaglandin e1	neg
1411	M715T37_1	2-linoleoyl-1-palmitoyl-sn-glycero-3-phosphoethanolamine	neg
1412	M717T138	1-palmitoyl-3-oleoyl-sn-glycero-2-phosphoethanolamine	neg
1413	M673T49	1-Palmitoyl-2-oleoyl-sn-glycero-3-phosphate	neg
1414	M719T74	Pg 32:1	neg
1415	M677T259	Icariin	pos
1416	M677T439_1	6-hydroxy-3-[3-hydroxy-4-[3,4,5-trihydroxy-6-[[3,4,5-trihydroxy-6-(hydroxymethyl)oxan-2-yl]oxymethyl]oxan-2-yl]oxyphenyl]-5,7-dimethoxychromen-4-one	pos
1417	M722T76	1,2-dipalmitoyl-sn-glycero-3-phospho-(1'-rac-glycerol)	neg
1418	M725T415	Camelliaside b	neg
1419	M725T49_2	N-palmitoyltaurine	neg
1420	M734T147_2	PS(16:0/16:0)	neg
1421	M237T29_2	D-erythro-imidazolylglycerol phosphate	neg
1422	M678T412	Vitamin b12	pos
1423	M705T278_2	2-[4-[(3s,3ar,6s,6ar)-6-[3-methoxy-4-[3,4,5-trihydroxy-6-(hydroxymethyl)oxan-2-yl]oxyphenyl]-1,3,3a,4,6,6a-hexahydrofuro[3,4-c]furan-3-yl]-2-methoxyphenoxy]-6-(hydroxymethyl)oxane-3,4,5-triol	pos
1424	M739T55	Pe(16:1e/15-hete)	neg
1425	M743T56_1	1-stearoyl-2-linoleoyl-sn-glycero-3-phosphoethanolamine	neg
1426	M745T504	1-(1,2r-dioctanoylphosphatidyl)inositol-3,4-bisphosphate	neg
1427	M718T223_2	1-palmitoyl-2-(4-ketododec-3-enedioyl)phosphatidylcholine	neg
1428	M679T391	Thiofluor 623	pos
1429	M751T113	1-myristoyl-2-palmitoyl-sn-glycero-3-phosphocholine	neg
1430	M679T420	3'-.alpha.-sialyl-n-acetyllactosamine	pos
1431	M681T285	Indanofan	pos
1432	M753T326	3-[4,5-dihydroxy-3-[(2r,3r,4r,5r,6s)-3,4,5-trihydroxy-6-methyloxan-2-yl]oxy-6-[[(2r,3r,4r,5r,6s)-3,4,5-trihydroxy-6-methyloxan-2-yl]oxymethyl]oxan-2-yl]oxy-5-hydroxy-2-(4-hydroxyphenyl)-7-methoxychromen-4-one	neg
1433	M592T398_1	Creatinol o-phosphate	pos
1434	M755T380_1	Forsythoside b	neg
1435	M755T409	Cyanidin 3-(2g-glucosylrutinoside)	neg
1436	M757T177	1,2-dioleoyl-sn-glycero-3-phosphoethanolamine-n-methyl	neg
1437	M757T276	Methyl (2s,3r,4s)-3-ethenyl-4-[(z)-3-[(2s,3r,4r)-3-ethenyl-5-methoxycarbonyl-2-[(2s,3r,4s,5s,6r)-3,4,5-trihydroxy-6-(hydroxymethyl)oxan-2-yl]oxy-3,4-dihydro-2h-pyran-4-yl]-4-oxobut-2-enyl]-2-[(2s,3r,4s,5s,6r)-3,4,5-trihydroxy-6-(hydroxymethyl)oxan-2-yl]oxy-3,4-dihydro-2h-pyran-5-carboxylate	neg
1438	M757T288	3-[(2s,3r,4s,5r,6r)-4-[(2s,3r,4s,5s,6r)-4,5-dihydroxy-6-(hydroxymethyl)-3-[(2s,3r,4s,5r)-3,4,5-trihydroxyoxan-2-yl]oxyoxan-2-yl]oxy-3,5-dihydroxy-6-(hydroxymethyl)oxan-2-yl]oxy-2-(3,4-dihydroxyphenyl)-5,7-dihydroxychromen-4-one	neg
1439	M684T496_3	6-acetylacteoside	pos
1440	M68T311	Pyrrol	pos
1441	M72T277_2	Pyrrolidine	pos
1442	M737T424	Tritolyl phosphate	pos
1443	M771T393	Flavonol base + 4o, o-hex-dhex, o-hex	neg
1444	M693T308	Acetyl isogambogic acid	pos
1445	M783T196	1-palmitoyl-2-arachidonoyl-sn-glycero-3-phosphoserine	neg
1446	M784T27	Chenodeoxycholate	neg
1447	M785T502	Flavin adenine dinucleotide (FAD)	neg
1448	M124T294	Taurine	neg
1449	M693T594	[1-hexadecanoyloxy-3-phosphonooxypropan-2-yl]octadec-9-enoate	pos
1450	M789T149	Pc 32:2	neg
1451	M791T185	Pe(18:1e/20-hdohe)	neg
1452	M791T202	Benzoic acid, 3-[(e)-[(3ar,4s,5s,6ar)-4-[(1e,3r)-3-cyclohexyl-3-hydroxy-1-propen-1-yl]hexahydro-5-hydroxy-2(1h)-pentalenylidene]methyl]-, rel-	neg
1453	M792T103	1-hexadecyl lysophosphatidic acid	neg
1454	M793T191	Phosphonic acid, p-[[4-[(1-oxotetradecyl)amino]phenyl]methyl]-	neg
1455	M796T202_1	Pg 38:5	neg
1456	M797T469	[3,4-dihydroxy-6-[5-hydroxy-2-(4-hydroxyphenyl)-4-oxo-7-[3,4,5-trihydroxy-6-(hydroxymethyl)oxan-2-yl]oxychromen-3-yl]oxy-5-[(2s,3r,4r,5r,6s)-3,4,5-trihydroxy-6-methyloxan-2-yl]oxyoxan-2-yl]methyl acetate	neg
1457	M803T119	Pc 33:2	neg
1458	M810T201_2	Pi 32:0	neg
1459	M694T169	Cer 24:1-d7 (d18:1-d7/24:1)	pos
1460	M695T420	Benzenesulfonamide, 2-methoxy-n-(1,2,3,4-tetrahydro-3-methyl-2-oxo-6-quinazolinyl)-	pos
1461	M698T180	2-tpahhda [dmed-fahfa]	pos
1462	M699T220	6,8-dihydroxy-2,2,4,4-tetramethyl-7-(3-methylbutanoyl)-9-(2-methylpropyl)-9h-xanthene-1,3-dione	pos
1463	M699T348	Theaflavin 3-gallate	pos
1464	M704T32_1	Palmitoyl sphingomyelin	pos
1465	M811T492	Haploperoside c acetate	neg
1466	M739T147	Pe 36:4	neg
1467	M815T146	Pc 34:3	neg
1468	M705T497	Laminaritetraose	pos
1469	M707T365	4.alpha.-mannobiose	pos
1470	M816T69_1	Ginsenoside f3	neg
1471	M180T32	Acamprosate	neg
1472	M709T305	Specnuezhenide	pos
1473	M709T420	Secoisolariciresinol diglucoside	pos
1474	M741T40_1	1-palmitoyl-2-oleoyl-sn-glycero-3-phosphoethanolamine	pos
1475	M70T311_2	2-Amino-2-methyl-1,3-propanediol	pos
1476	M817T23	Flavonol base + 4o, 1meo, o-hex-hex, o-hex	neg
1477	M713T328	Methyl (5z)-5-[2-(4-hydroxy-3-methoxybenzoyl)oxyethylidene]-4-[2-[2-(4-hydroxyphenyl)ethoxy]-2-oxoethyl]-6-[(2s,3r,4s,5s,6r)-3,4,5-trihydroxy-6-(hydroxymethyl)oxan-2-yl]oxy-4h-pyran-3-carboxylate	pos
1478	M713T346	Sulindac	pos
1479	M721T400	2-thiophenecarboxamide, 3-[(aminocarbonyl)amino]-5-[4-(4-morpholinylmethyl)phenyl]-	pos
1480	M818T68	Pg 40:8	neg
1481	M723T304	Hydroxyitraconazole	pos
1482	M819T23	Aloenin	neg
1483	M827T511_2	Pentasaccharides (hex-hex-hex-hex-hex)	neg
1484	M829T199_3	Ginsenoside f2	neg
1485	M181T158_2	(n-(-2-acetamido))-2-aminoethanesulfonic acid	neg
1486	M746T73_1	1-palmitoyl-2-linoleoyl-sn-glycero-3-phospho-(1'-rac-glycerol)	neg
1487	M72T303	1,2-diamino-2-methylpropane	pos
1488	M731T150	1,2-dipalmitoleoyl-sn-glycero-3-phosphocholine	pos
1489	M487T13	N-[tris(hydroxymethyl)methyl]-3-aminopropanesulfonic acid	pos
1490	M834T199	Pi 34:2	neg
1491	M741T150	1,2-dilinoleoyl-sn-glycero-3-phosphoethanolamine	pos
1492	M770T70_1	1,2-dilinoleoyl-sn-glycero-3-phospho-(1'-rac-glycerol)	neg
1493	M744T210_1	Montelukast acyl-.beta.-d-glucuronide	pos
1494	M745T150_1	1,2-dioleoyl-sn-glycero-3-phosphoethanolamine	pos
1495	M835T30_1	1,2-distearoyl-sn-glycero-3-phosphocholine	neg
1496	M839T144	Pc(16:1e/8,9-epete)	neg
1497	M840T66_1	Pg 42:11	neg
1498	M783T147_1	2-oleoyl-1-palmitoyl-sn-glycero-3-phosphocholine	pos
1499	M817T147	Pc(16:1e/9-hode)	neg
1500	M745T290	Scropolioside d	pos
1501	M746T436	Lnnt	pos
1502	M747T40	1-stearoyl-2-oleoyl-sn-glycero-3-phosphoethanolamine	pos
1503	M749T238_1	Erioglaucine	pos
1504	M749T407	5-hydroxy-3-[(2s,3r,4r,5s)-3-hydroxy-5-(hydroxymethyl)-4-[(2s,3r,4s,5s,6r)-3,4,5-trihydroxy-6-(hydroxymethyl)oxan-2-yl]oxyoxolan-2-yl]oxy-2-(4-hydroxyphenyl)-7-[(2s,3r,4r,5r,6s)-3,4,5-trihydroxy-6-methyloxan-2-yl]oxychromen-4-one	pos
1505	M842T66	Pg 42:10	neg
1506	M517T279	N-[tris(hydroxymethyl)methyl]-3-amino-2-hydroxypropanesulfonic acid	neg
1507	M757T148_1	PC(16:0/16:0)	pos
1508	M843T86	Pc(16:0e/5,6-eet)	neg
1509	M759T118	Thioetheramide-PC	pos
1510	M848T204	Pi(16:1/13-hode)	neg
1511	M850T205	Pi(16:0/9-hode)	neg
1512	M841T144	Pc(16:0e/8-hepe)	neg
1513	M759T149_1	1-hexadecanoyl-2-octadecadienoyl-sn-glycero-3-phosphocholine	pos
1514	M759T70	1-palmitoyl-2-linoleoyl-sn-glycero-3-phosphocholine	pos
1515	M763T328	Robinin	pos
1516	M765T262	Eleutheroside e	pos
1517	M857T153	Pc(16:0/8-hete)	neg
1518	M769T504	4'-o-(2'-e-coumaroyl glua)(1-2)glua) apigenin	pos
1519	M772T236	1-palmitoyl-2-oleoyl-phosphatidylglycerol	pos
1520	M857T420	Epimedin c	neg
1521	M779T409	5,7-dihydroxy-2-[4-[(2s,3r,4s,5s,6r)-3,4,5-trihydroxy-6-(hydroxymethyl)oxan-2-yl]oxyphenyl]-3-[(2s,3r,4s,5s,6r)-3,4,5-trihydroxy-6-[[(2r,3r,4r,5r,6s)-3,4,5-trihydroxy-6-methyloxan-2-yl]oxymethyl]oxan-2-yl]oxychromen-4-one	pos
1522	M841T62	Pc(16:0e/11,12-epete)	neg
1523	M856T197_1	Pi 36:5	neg
1524	M859T388	Fostriecin	neg
1525	M858T197	Pi 36:4	neg
1526	M863T474	Apigenin 7-glucoside	neg
1527	M865T535	Procyanidin c1	neg
1528	M785T63	Arachidonoylthiophosphorylcholine	pos
1529	M787T210	Oligomycin b	pos
1530	M871T33_3	Astragaloside ii	neg
1531	M789T394_2	N-acetyl-d-lactosamine	pos
1532	M791T376	Calphostin c	pos
1533	M793T395	3-[(2s,3r,4s,5s,6r)-4,5-dihydroxy-3-[(2r,3r,4r,5r,6s)-3,4,5-trihydroxy-6-methyloxan-2-yl]oxy-6-[[(2r,3r,4r,5r,6s)-3,4,5-trihydroxy-6-methyloxan-2-yl]oxymethyl]oxan-2-yl]oxy-5,7-dihydroxy-2-(4-hydroxyphenyl)-6-methoxychromen-4-one	pos
1534	M875T178	1,2-diarachidonoyl-sn-glycero-3-phosphocholine	neg
1535	M807T115	1-palmitoyl-2-docosahexaenoyl-sn-glycero-3-phosphocholine	pos
1536	M809T185	1,2-dioleoyl-sn-glycero-3-phosphatidylcholine	pos
1537	M809T241_2	Echinacoside	pos
1538	M209T27	N-octyl sulfate	neg
1539	M809T265	Xanthorhamnin	pos
1540	M80T64	Pyridine	pos
1541	M811T146	1-Stearoyl-2-oleoyl-sn-glycerol 3-phosphocholine (SOPC)	pos
1542	M811T216	4-thiazolidinone, 5-[[1-(2,4-difluorophenyl)-2,5-dimethyl-1h-pyrrol-3-yl]methylene]-2-[(2-methoxyethyl)imino]-3-methyl-, (2z,5z)-	pos
1543	M884T233	Pi 38:5	neg
1544	M819T412	B-pentasaccharide	pos
1545	M827T265	2-[[4-[4,6-dihydroxy-3-(3-methylbut-2-enyl)-2-[3,4,5-trihydroxy-6-(hydroxymethyl)oxan-2-yl]oxyphenyl]-3-hydroxy-2-(4-hydroxyphenyl)-5-methoxy-3,4-dihydro-2h-chromen-7-yl]oxy]-6-(hydroxymethyl)oxane-3,4,5-triol	pos
1546	M886T161	Pi 38:4	neg
1547	M887T297_2	[(2r,3r,4r,5r,6r)-2-[[(2r,3r,4r)-3,4-dihydroxy-4-(hydroxymethyl)oxolan-2-yl]oxymethyl]-4-[(2s,3r,4r,5r,6s)-4,5-dihydroxy-6-methyl-3-[(2s,3r,4s,5s)-3,4,5-trihydroxyoxan-2-yl]oxyoxan-2-yl]oxy-6-[2-(3,4-dihydroxyphenyl)ethoxy]-5-hydroxyoxan-3-yl] (e)-3-(3,4-dihydroxyphenyl)prop-2-enoate	neg
1548	M860T197	Pi(16:0e/15-hete)	neg
1549	M83T300	Glutaraldehyde	pos
1550	M846T512_10	Maltopentaose	pos
1551	M881T374_2	Bussein	pos
1552	M850T203	1,2-dipalmitoyl-sn-glycero-3-phospho-(1'-myo-inositol)	pos
1553	M891T181	Pc 40:7	neg
1554	M853T155	.alpha.-chaconine	pos
1555	M85T263	1h-1,2,4-triazol-3-amine	pos
1556	M85T85	Valeric acid	pos
1557	M861T302_2	Epimedin a	pos
1558	M473T27	Amastatin	neg
1559	M657T38	Enniatin b	pos
1560	M865T422	Sialyl lewis x	pos
1561	M917T230	3-[(2s,3r,4s,5r,6r)-3-[(2s,3r,4r,5s,6s)-3,5-dihydroxy-6-methyl-4-[(2s,3r,4s,5s,6r)-3,4,5-trihydroxy-6-(hydroxymethyl)oxan-2-yl]oxyoxan-2-yl]oxy-4,5-dihydroxy-6-[[(2r,3r,4r,5r,6s)-3,4,5-trihydroxy-6-methyloxan-2-yl]oxymethyl]oxan-2-yl]oxy-2-(3,4-dihydroxyphenyl)-5,7-dihydroxychromen-4-one	neg
1562	M900T230	Pi(20:3/13-hode)	neg
1563	M903T292	[3,4-dihydroxy-5-[2-methylidene-4-[(2r,3r,4s,5s,6r)-3,4,5-trihydroxy-6-[[2-methylidene-4-[(2r,3r,4s,5s,6r)-3,4,5-trihydroxy-6-[(4-hydroxy-2-methylidenebutanoyl)oxymethyl]oxan-2-yl]oxybutanoyl]oxymethyl]oxan-2-yl]oxybutanoyl]oxyoxan-2-yl]methyl 4-hydroxy-2-methylidenebutanoate	pos
1564	M903T40_4	Timosaponin b ii	pos
1565	M907T231	Antibiotic k 252b	pos
1566	M671T38	(3s,6r,9s,12r,15s,18r)-3-butan-2-yl-4,10,16-trimethyl-6,9,12,15,18-penta(propan-2-yl)-1,7,13-trioxa-4,10,16-triazacyclooctadecane-2,5,8,11,14,17-hexone	pos
1567	M901T335	[(2s,3r,4s,5s,6r)-2-[3-[(2s,3r,4s,5s,6r)-4,5-dihydroxy-6-(hydroxymethyl)-3-[(2s,3r,4r,5r,6s)-3,4,5-trihydroxy-6-methyloxan-2-yl]oxyoxan-2-yl]oxy-5-hydroxy-2-(4-hydroxyphenyl)-4-oxochromen-7-yl]oxy-4,5-dihydroxy-6-(hydroxymethyl)oxan-3-yl] (e)-3-(4-hydroxyphenyl)prop-2-enoate	neg
1568	M690T238	Enniatin a1	pos
1569	M911T170	Man3 a	pos
1570	M913T304	G2f	pos
1571	M922T283	Decanoyl-coa	pos
1572	M913T207	Pc 42:10	neg
1573	M932T39	Angiotensin iii	pos
1574	M927T170	(2r,3r,4s,5s,6r)-2-[[(2r,3s,4s,5r,6s)-6-[4-[3-[3,5-dimethoxy-4-[(2s,3r,4s,5s,6r)-3,4,5-trihydroxy-6-(hydroxymethyl)oxan-2-yl]oxyphenyl]-1,3,3a,4,6,6a-hexahydrofuro[3,4-c]furan-6-yl]-2,6-dimethoxyphenoxy]-3,4,5-trihydroxyoxan-2-yl]methoxy]-6-(hydroxymethyl)oxane-3,4,5-triol	pos
1575	M709T293	Jasplakinolide	pos
1576	M937T137_2	Soyasapogenol b base + o-ddmp, o-hexa-hexa	pos
1577	M939T425	Bucladesine	pos
1578	M754T186	Microcolin b	pos
1579	M94T262	Aniline	pos
1580	M95T392	3-aminopyridine	pos
1581	M961T264	Man9	pos
1582	M93T299	Phenol	neg
1583	M94T85	3-hydroxypyridine	neg
1584	M983T226	[(2r,3s,4s,5r,6s)-6-[(2s,3r,4s,5r,6r)-6-[[(1s,3r,4s,4ar,8ar)-4-[(3s)-3-[(2s,3r,4r,5r,6r)-3,4-dihydroxy-6-methyl-5-[(2s,3r,4r,5r,6s)-3,4,5-trihydroxy-6-methyloxan-2-yl]oxyoxan-2-yl]oxy-3-methylpent-4-enyl]-3,4,8,8a-tetramethyl-1,2,3,4a,5,6-hexahydronaphthalen-1-yl]oxy]-4,5-dihydroxy-2-methyloxan-3-yl]oxy-3,4,5-trihydroxyoxan-2-yl]methyl acetate	neg
1585	M96T54	2(1h)-pyridinone	pos
1586	M178T66	Cyclohexanesulfamic acid	neg
