# Supplementary material for: Comparative metabolomics provides novel insights into correlation between dominant habitat factors and constituents of Stellaria Radix (Stellaria dichotoma L. var. lanceolata Bge.)
Source: Front Plant Sci. 2022 Nov 25;13:1035712. doi: 10.3389/fpls.2022.1035712 (PMC9733579; doi:10.3389/fpls.2022.1035712)
Supplement: Supplementary file 7 [file Table_2.xlsx]

## Sheet: Sheet2
Table 2 Hub metabolites in SDL that are highly correlated with dominant habitat factors.
Important Metabolites Module	ID	Name	Class
MEblue-Elevation	M357T536	.beta.-estradiol 17-valerate	Lipids and lipid-like molecules
MEblue-Elevation	M524T193_4	1-stearoyl-2-hydroxy-sn-glycero-3-phosphocholine	Lipids and lipid-like molecules
MEblue-Elevation	M157T280_2	2-oxooctanoic acid	Organic acids and derivatives
MEblue-Elevation	M121T182_2	4-imidazoleacrylic acid	Organoheterocyclic compounds
MEblue-Elevation	M251T205	Bisphenol m	Phenylpropanoids and polyketides
MEblue-Elevation	M221T282_1	Indole-3-pyruvic acid	Organoheterocyclic compounds
MEblue-Elevation	M130T282	L-arginine, methyl ester	Organic acids and derivatives
MEblue-Elevation	M245T187_2	Leu-Leu	Organic acids and derivatives
MEblue-Elevation	M175T282_2	N-.alpha.-acetyl-l-ornithine	Organic acids and derivatives
MEblue-Elevation	M840T66_1	Pg 42:11	Lipids and lipid-like molecules
MEblue-Elevation	M561T123	Protoporphyrin ix	Alkaloids and derivatives
MEblue-Elevation	M1035T92	Tomatine	Lipids and lipid-like molecules
MEblue-Elevation	M139T182	Urocanate	Organoheterocyclic compounds
MEblue-Elevation	M203T282_1	Vasicinone	Organoheterocyclic compounds
MEturquoise-Average annual temperature	M411T333_2	4-[(2r,3r,4s,5s,6r)-3,4,5-trihydroxy-6-(hydroxymethyl)oxan-2-yl]oxypentan-2-yl (e)-3-(4-hydroxyphenyl)prop-2-enoate	Lipids and lipid-like molecules
MEturquoise-Average annual temperature	M208T160	Benzoylcholine	Benzenoids
MEturquoise-Average annual temperature	M497T336	Chicoric acid	Organic acids and derivatives
MEturquoise-Average annual temperature	M302T420	Gly-Pro-Glu	Organic acids and derivatives
MEturquoise-Average annual temperature	M435T336_2	Irisxanthone	Organoheterocyclic compounds
MEturquoise-Average annual temperature	M501T353	Isorhamnetin 3-galactoside	Phenylpropanoids and polyketides
MEturquoise-Average annual temperature	M639T418	Plantamajoside	Phenylpropanoids and polyketides
MEturquoise-Average annual temperature	M459T308	Podophyllotoxin	Lignans, neolignans and related compounds
MEturquoise-Average annual temperature	M617T328_2	Poncirin	Phenylpropanoids and polyketides
MEturquoise-Average annual temperature	M453T51_1	Silybin	Phenylpropanoids and polyketides
MEturquoise-Average annual temperature	M343T63	Thiamine monophosphate	Organoheterocyclic compounds
MEbrown-Latitude	M179T159	(+)-dimethyl l-tartrate	Organic acids and derivatives
MEbrown-Latitude	M137T299_2	4-hydroxybenzoate	Benzenoids
MEbrown-Latitude	M407T411	6a,12a-didehydroamorphigenin	Phenylpropanoids and polyketides
MEbrown-Latitude	M497T282_1	Candesartan cilexetil	Benzenoids
MEbrown-Latitude	M181T275	Dapsone	Organic oxygen compounds
MEbrown-Latitude	M472T278	D-sorbitol	Organic acids and derivatives
MEbrown-Latitude	M423T205	Folinic acid	Benzenoids
MEbrown-Latitude	M499T284	Isochlorogenic acid b	Organic oxygen compounds
MEbrown-Latitude	M789T394_2	N-acetyl-d-lactosamine	Lipids and lipid-like molecules
MEbrown-Latitude	M93T299	Phenol	Benzenoids
MEbrown-Latitude	M323T441	Uridine 5'-monophosphate	Nucleosides, nucleotides, and analogues
MEturquoise-Soil tital salt content	M236T331	1-(benzo[d][1,3]dioxol-4-yl)-2-(methylamino)pentan-1-one	Benzenoids
MEturquoise-Soil tital salt content	M194T212	2-methyl-n-(4-methylphenyl)alanine	Organic acids and derivatives
MEturquoise-Soil tital salt content	M329T33	4,2'-dihydroxy-3,4',6'-trimethoxychalcone	Phenylpropanoids and polyketides
MEturquoise-Soil tital salt content	M411T333_2	4-[(2r,3r,4s,5s,6r)-3,4,5-trihydroxy-6-(hydroxymethyl)oxan-2-yl]oxypentan-2-yl (e)-3-(4-hydroxyphenyl)prop-2-enoate	Lipids and lipid-like molecules
MEturquoise-Soil tital salt content	M524T332	Acrinathrin	Lipids and lipid-like molecules
MEturquoise-Soil tital salt content	M437T34_2	Alisol b acetate	Lipids and lipid-like molecules
MEturquoise-Soil tital salt content	M94T262	Aniline	Benzenoids
MEturquoise-Soil tital salt content	M123T242	Benzoic acid	Benzenoids
MEturquoise-Soil tital salt content	M208T160	Benzoylcholine	Benzenoids
MEturquoise-Soil tital salt content	M465T412	Catalposide	Organic oxygen compounds
MEturquoise-Soil tital salt content	M497T336	Chicoric acid	Organic acids and derivatives
MEturquoise-Soil tital salt content	M224T241_1	Dacarbazine	Organic acids and derivatives
MEturquoise-Soil tital salt content	M240T338	D-glucosamine 6-phosphate	Organic oxygen compounds
MEturquoise-Soil tital salt content	M185T140	Gabapentin related compound e	Organic acids and derivatives
MEturquoise-Soil tital salt content	M392T214_1	Guanidinopropionic acid	Organic nitrogen compounds
MEturquoise-Soil tital salt content	M181T170	Harmane	Alkaloids and derivatives
MEturquoise-Soil tital salt content	M285T206_2	Hexadecanedioic acid	Lipids and lipid-like molecules
MEturquoise-Soil tital salt content	M341T145	Hexadecanedioic acid, 3,3,14,14-tetramethyl-	Lipids and lipid-like molecules
MEturquoise-Soil tital salt content	M286T418	Hydromorphone-3-.beta.-d-glucuronide	Organic acids and derivatives
MEturquoise-Soil tital salt content	M435T336_2	Irisxanthone	Organoheterocyclic compounds
MEturquoise-Soil tital salt content	M501T353	Isorhamnetin 3-galactoside	Phenylpropanoids and polyketides
MEturquoise-Soil tital salt content	M621T406	Jacaglabroside b	Unidentified
MEturquoise-Soil tital salt content	M214T175	L-n5-(1-imino-3-pentenyl)ornithine	Organic acids and derivatives
MEturquoise-Soil tital salt content	M599T464	Methyl 5,6-diacetyloxy-10-hydroxy-2,4b,7,7,10a,12a-hexamethyl-12-methylidene-1,4,8-trioxo-4a,5,6,6a,9,10,10b,11-octahydronaphtho[1,2-h]isochromene-2-carboxylate	Lipids and lipid-like molecules
MEturquoise-Soil tital salt content	M313T172	Octadecanedioic acid	Lipids and lipid-like molecules
MEturquoise-Soil tital salt content	M483T108	Octapropylene glycol	Organic oxygen compounds
MEturquoise-Soil tital salt content	M403T54	Oleoside 11-methyl ester	Lipids and lipid-like molecules
MEturquoise-Soil tital salt content	M208T197	Phenylalanine betaine	Alkaloids and derivatives
MEturquoise-Soil tital salt content	M639T418	Plantamajoside	Phenylpropanoids and polyketides
MEturquoise-Soil tital salt content	M459T308	Podophyllotoxin	Lignans, neolignans and related compounds
MEturquoise-Soil tital salt content	M617T328_2	Poncirin	Phenylpropanoids and polyketides
MEturquoise-Soil tital salt content	M453T51_1	Silybin	Phenylpropanoids and polyketides
MEturquoise-Soil tital salt content	M173T361	Suberic acid	Lipids and lipid-like molecules
MEturquoise-Soil tital salt content	M343T63	Thiamine monophosphate	Organoheterocyclic compounds
MEturquiose-Soil PH value	M236T331	1-(benzo[d][1,3]dioxol-4-yl)-2-(methylamino)pentan-1-one	Benzenoids
MEturquiose-Soil PH value	M317T33_1	1,4-d-xylobiose	Organic oxygen compounds
MEturquiose-Soil PH value	M194T212	2-methyl-n-(4-methylphenyl)alanine	Organic acids and derivatives
MEturquiose-Soil PH value	M329T33	4,2'-dihydroxy-3,4',6'-trimethoxychalcone	Phenylpropanoids and polyketides
MEturquiose-Soil PH value	M411T333_2	4-[(2r,3r,4s,5s,6r)-3,4,5-trihydroxy-6-(hydroxymethyl)oxan-2-yl]oxypentan-2-yl (e)-3-(4-hydroxyphenyl)prop-2-enoate	Lipids and lipid-like molecules
MEturquiose-Soil PH value	M524T332	Acrinathrin	Lipids and lipid-like molecules
MEturquiose-Soil PH value	M437T34_2	Alisol b acetate	Lipids and lipid-like molecules
MEturquiose-Soil PH value	M94T262	Aniline	Benzenoids
MEturquiose-Soil PH value	M123T242	Benzoic acid	Benzenoids
MEturquiose-Soil PH value	M208T160	Benzoylcholine	Benzenoids
MEturquiose-Soil PH value	M465T412	Catalposide	Organic oxygen compounds
MEturquiose-Soil PH value	M497T336	Chicoric acid	Organic acids and derivatives
MEturquiose-Soil PH value	M655T456	Coproporphyrin I	Organoheterocyclic compounds
MEturquiose-Soil PH value	M224T241_1	Dacarbazine	Organic acids and derivatives
MEturquiose-Soil PH value	M240T338	D-glucosamine 6-phosphate	Organic oxygen compounds
MEturquiose-Soil PH value	M501T323	Flavine mononucleotide	Unidentified
MEturquiose-Soil PH value	M181T170	Harmane	Alkaloids and derivatives
MEturquiose-Soil PH value	M285T206_2	Hexadecanedioic acid	Lipids and lipid-like molecules
MEturquiose-Soil PH value	M341T145	Hexadecanedioic acid, 3,3,14,14-tetramethyl-	Lipids and lipid-like molecules
MEturquiose-Soil PH value	M435T336_2	Irisxanthone	Organoheterocyclic compounds
MEturquiose-Soil PH value	M501T353	Isorhamnetin 3-galactoside	Phenylpropanoids and polyketides
MEturquiose-Soil PH value	M621T406	Jacaglabroside b	Unidentified
MEturquiose-Soil PH value	M214T175	L-n5-(1-imino-3-pentenyl)ornithine	Organic acids and derivatives
MEturquiose-Soil PH value	M599T464	Methyl 5,6-diacetyloxy-10-hydroxy-2,4b,7,7,10a,12a-hexamethyl-12-methylidene-1,4,8-trioxo-4a,5,6,6a,9,10,10b,11-octahydronaphtho[1,2-h]isochromene-2-carboxylate	Lipids and lipid-like molecules
MEturquiose-Soil PH value	M313T172	Octadecanedioic acid	Lipids and lipid-like molecules
MEturquiose-Soil PH value	M483T108	Octapropylene glycol	Organic oxygen compounds
MEturquiose-Soil PH value	M403T54	Oleoside 11-methyl ester	Lipids and lipid-like molecules
MEturquiose-Soil PH value	M208T197	Phenylalanine betaine	Alkaloids and derivatives
MEturquiose-Soil PH value	M639T418	Plantamajoside	Phenylpropanoids and polyketides
MEturquiose-Soil PH value	M459T308	Podophyllotoxin	Lignans, neolignans and related compounds
MEturquiose-Soil PH value	M617T328_2	Poncirin	Phenylpropanoids and polyketides
MEturquiose-Soil PH value	M453T51_1	Silybin	Phenylpropanoids and polyketides
MEturquiose-Soil PH value	M173T361	Suberic acid	Lipids and lipid-like molecules
MEturquiose-Soil PH value	M343T63	Thiamine monophosphate	Organoheterocyclic compounds
MEbrown-Soil texture	M179T159	(+)-dimethyl l-tartrate	Organic acids and derivatives
MEbrown-Soil texture	M617T249	(2r,3s,4s,5r,6r)-6-[1,7-bis(4-hydroxyphenyl)heptan-3-yloxy]-5-[(2s,3r,4r)-3,4-dihydroxy-4-(hydroxymethyl)oxolan-2-yl]oxy-2-(hydroxymethyl)oxane-3,4-diol	Phenylpropanoids and polyketides
MEbrown-Soil texture	M745T504	1-(1,2r-dioctanoylphosphatidyl)inositol-3,4-bisphosphate	Lipids and lipid-like molecules
MEbrown-Soil texture	M811T146	1-Stearoyl-2-oleoyl-sn-glycerol 3-phosphocholine (SOPC)	Lipids and lipid-like molecules
MEbrown-Soil texture	M509T450	3'-galactosyllactose	Organic oxygen compounds
MEbrown-Soil texture	M137T299_2	4-hydroxybenzoate	Benzenoids
MEbrown-Soil texture	M811T216	4-thiazolidinone, 5-[[1-(2,4-difluorophenyl)-2,5-dimethyl-1h-pyrrol-3-yl]methylene]-2-[(2-methoxyethyl)imino]-3-methyl-, (2z,5z)-	Organoheterocyclic compounds
MEbrown-Soil texture	M337T408	5'-phosphoribosyl-5-amino-4-imidazolecarboxamide (aicar)	Nucleosides, nucleotides, and analogues
MEbrown-Soil texture	M407T411	6a,12a-didehydroamorphigenin	Phenylpropanoids and polyketides
MEbrown-Soil texture	M325T451	Cellobiose	Organic oxygen compounds
MEbrown-Soil texture	M497T282_1	Dapsone	Benzenoids
MEbrown-Soil texture	M209T437	D-Galactarate	Organic oxygen compounds
MEbrown-Soil texture	M519T427	D-glucosamine 1-phosphate	Organic oxygen compounds
MEbrown-Soil texture	M209T298	Dl-lanthionine	Organic acids and derivatives
MEbrown-Soil texture	M225T476	D-Mannose-6-phosphate	Organic oxygen compounds
MEbrown-Soil texture	M193T268_1	D-pinitol	Organic oxygen compounds
MEbrown-Soil texture	M181T275	D-sorbitol	Organic oxygen compounds
MEbrown-Soil texture	M315T81	Febuxostat	Organoheterocyclic compounds
MEbrown-Soil texture	M472T278	Folinic acid	Organic acids and derivatives
MEbrown-Soil texture	M595T249	Ganoderic acid h	Lipids and lipid-like molecules
MEbrown-Soil texture	M395T272	Gartanin	Organoheterocyclic compounds
MEbrown-Soil texture	M499T284	Isochlorogenic acid b	Organic oxygen compounds
MEbrown-Soil texture	M431T242	Khelloside	Organoheterocyclic compounds
MEbrown-Soil texture	M522T450_3	Maltotriose	Organic oxygen compounds
MEbrown-Soil texture	M583T493	Neomangiferin	Organoheterocyclic compounds
MEbrown-Soil texture	M227T171	Nitrotyrosine	Organic acids and derivatives
MEbrown-Soil texture	M153T283	O,o-diethyl phosphate	Organic acids and derivatives
MEbrown-Soil texture	M93T299	Phenol	Benzenoids
MEbrown-Soil texture	M344T370	Propiconazole	Benzenoids
MEbrown-Soil texture	M335T25_2	Prostaglandin b1	Lipids and lipid-like molecules
MEbrown-Soil texture	M648T410	Pyribenzoxim	Benzenoids
MEbrown-Soil texture	M191T268	Quinate	Organic oxygen compounds
MEbrown-Soil texture	M122T359	Quinolinate	Organoheterocyclic compounds
MEbrown-Soil texture	M517T480	Sibiricose a5	Phenylpropanoids and polyketides
MEbrown-Soil texture	M125T268	Triacetic acid lactone	Organoheterocyclic compounds
MEbrown-Soil texture	M323T441	Uridine 5'-monophosphate	Nucleosides, nucleotides, and analogues
MEbrown-Soil texture	M85T85	Valeric acid	Lipids and lipid-like molecules
MEbrown-Average annual precipitation	M745T504	1-(1,2r-dioctanoylphosphatidyl)inositol-3,4-bisphosphate	Lipids and lipid-like molecules
MEbrown-Average annual precipitation	M137T299_2	4-hydroxybenzoate	Benzenoids
MEbrown-Average annual precipitation	M407T411	6a,12a-didehydroamorphigenin	Phenylpropanoids and polyketides
MEbrown-Average annual precipitation	M497T282_1	Dapsone	Benzenoids
MEbrown-Average annual precipitation	M209T437	D-Galactarate	Organic oxygen compounds
MEbrown-Average annual precipitation	M181T275	D-sorbitol	Organic oxygen compounds
MEbrown-Average annual precipitation	M472T278	Folinic acid	Organic acids and derivatives
MEbrown-Average annual precipitation	M499T284	Isochlorogenic acid b	Organic oxygen compounds
MEbrown-Average annual precipitation	M583T493	Neomangiferin	Organoheterocyclic compounds
MEbrown-Average annual precipitation	M93T299	Phenol	Benzenoids
MEbrown-Average annual precipitation	M344T370	Propiconazole	Benzenoids
MEbrown-Average annual precipitation	M871T33_3	Astragaloside ii	Lipids and lipid-like molecules
MEbrown-Average annual precipitation	M423T205	Candesartan cilexetil	Benzenoids
MEbrown-Average annual precipitation	M449T356	Deoxyrhapontin	Phenylpropanoids and polyketides
MEbrown-Average annual precipitation	M191T279	D-glucarate	Organic oxygen compounds
MEbrown-Average annual precipitation	M351T490	D-Glucuronolactone	Organoheterocyclic compounds
MEbrown-Average annual precipitation	M361T303_2	Dimefuron	Benzenoids
MEbrown-Average annual precipitation	M183T408	D-Mannitol	Organic oxygen compounds
MEbrown-Average annual precipitation	M229T403	D-ribose 1-phosphate	Organic oxygen compounds
MEbrown-Average annual precipitation	M225T139	Isopropyl 4-hydroxybenzoate	Benzenoids
MEbrown-Average annual precipitation	M323T441	Uridine 5'-monophosphate	Nucleosides, nucleotides, and analogues
MEbrown-Average annual precipitation	M609T263_1	Reserpine	Alkaloids and derivatives
MEbrown-Average annual precipitation	M214T393	sn-Glycerol 3-phosphoethanolamine	Lipids and lipid-like molecules
MEbrown-Average annual precipitation	M301T464	Temazepam	Organoheterocyclic compounds
MEbrown-Average annual precipitation	M403T473	Uridine 5'-diphosphate	Nucleosides, nucleotides, and analogues
